# Supplementary material
Source: publisher figshare collection journal article supplement (https://rs.figshare.com/ndownloader/files/9869326)
Supplement: Supplementary file 1 [file 9869326]

**Electronic Supplementary Material**

**Title:** Arboreality constrains morphological evolution but not species diversification in vipers

**Authors**: Laura R. V. Alencar, Marcio Martins, Gustavo Burin & Tiago B. Quental

*Proceedings of the Royal Society of London B*

DOI: 10.1098/rspb.2017.1775

Supplementary figures and tables….….….….….….….…..….….….….….….…..….….……2

Supplementary methods….….….….….…….….….….….….….….….….….….….….…….29

Supplementary results….….….….….….….….….….….….….….….….….….….….….…..39

Supplementary discussion….….….….…….….….….…….….….….….….….….….….…...40

Supplementary references….….….…..….….….….….….….….….….….……….….….......42

Appendix I….….….….….….….….….…….….….….….….….….….….….….….….….…44

**Supplementary figures and tables**

Table S1. (excel file)

Figure S1. Example of a stochastic character mapping (simmap) on a viper phylogeny. Colors on branches denote the evolution of different microhabitats in vipers. Circles at the tips indicate the predominant geographical occurrence of arboreal lineages.

Figure S2. Consensus tree showing the frequency of microhabitat states in simmap reconstructions. Note that only nodes present in all 1000 simmaps are depicted.

Figure S3. Median of transition rates (Q matrices) between microhabitat categories estimated in simmap reconstructions. Transitions rates less than 0.01 not shown.

Figure S4. Body size in vipers.

Figure S5. Phylogenetic residuals of tail length in vipers.

Figure S6. Phylogenetic residuals of mid-body circumference in vipers.

Table S2. Number of times (out of 1000 simmaps) each model was able to be fitted (number at the top labeled as “Fittings”) and the respective number each model was chosen as the best model (number at the bottom) in the analyses of body size evolution under the four-categories scheme. Each line represents “fittings” and “best model” frequencies with respect to the collection of simmaps fitted for the model shown in the shaded area. For example, in the first line 335 simmaps fitted OUMVA and out of those, 311 suggested it as the best model. From these 335 simmaps, 335 fitted both OUMVA and OUMV, but only 7 suggested OUMV as the best model. Best model frequency in each line does not sum the number of fittings of each reference model (in the first line example, 335) because some simmaps did not suggest a best model. We should note that OUMVA, OUMV and OUMA, were collectively chosen most of the time (at least 893/1000).

|  | BM1 | BMS | OU1 | OUM | OUMA | OUMV | **OUMVA** |
| --- | --- | --- | --- | --- | --- | --- | --- |
| Fittings | 335 | 335 | 335 | 335 | 187 | 335 | **335** |
| Best model | 0 | 0 | 0 | 0 | 2 | 7 | **311** |
|  | BM1 | BMS | OU1 | OUM | OUMA | **OUMV** | OUMVA |
| Fittings | 992 | 992 | 992 | 992 | 469 | **992** | 335 |
| Best model | 0 | 0 | 17 | 0 | 146 | **436** | 311 |
|  | BM1 | BMS | OU1 | OUM | **OUMA** | OUMV | OUMVA |
| Fittings | 469 | 469 | 469 | 469 | **469** | 469 | 187 |
| Best model | 0 | 0 | 0 | 0 | **146** | 124 | 173 |
|  | BM1 | BMS | OU1 | **OUM** | OUMA | OUMV | OUMVA |
| Fittings | 1000 | 1000 | 1000 | **1000** | 469 | 992 | 335 |
| Best model | 0 | 0 | 17 | **8** | 146 | 436 | 311 |
|  | BM1 | BMS | **OU1** | OUM | OUMA | OUMV | OUMVA |
| Fittings | 1000 | 1000 | **1000** | 1000 | 469 | 992 | 335 |
| Best model | 0 | 0 | **17** | 8 | 146 | 436 | 311 |
|  | BM1 | **BMS** | OU1 | OUM | OUMA | OUMV | OUMVA |
| Fittings | 1000 | **1000** | 1000 | 1000 | 469 | 992 | 335 |
| Best model | 0 | **0** | 17 | 8 | 146 | 436 | 311 |
|  | **BM1** | BMS | OU1 | OUM | OUMA | OUMV | OUMVA |
| Fittings | **1000** | 1000 | 1000 | 1000 | 469 | 992 | 335 |
| Best model | **0** | 0 | 17 | 8 | 146 | 436 | 311 |

Figure S7. Parameter estimates when OUMVA was chosen as best model in analyses of body size evolution where all models could be fitted (173 from 187 simmaps). Dots represent analyses performed in distinct simmaps. For better visualization we excluded extreme values and numbers on the top represent the proportion of values included.

Table S3. Number of fittings for each model (number at the top, total of 1000 simmaps) and the respective number each model was chosen as the best model (number at the bottom) in the analyses of body size evolution under the two-categories scheme. Each line represents the fitting and best model frequency with respect to the sample of simmaps fitted for each model separately (shaded). Best model frequency in each line does not sum the number of fittings of each reference model (in the first line example, 698) because some simmaps did not suggest a best model.

|  | BM1 | BMS | OU1 | OUM | OUMA | OUMV | **OUMVA** |
| --- | --- | --- | --- | --- | --- | --- | --- |
| Fittings | 698 | 698 | 698 | 698 | 593 | 693 | **698** |
| Best model | 0 | 0 | 0 | 0 | 2 | 1 | **686** |
|  | BM1 | BMS | OU1 | OUM | OUMA | **OUMV** | OUMVA |
| Fittings | 990 | 990 | 990 | 990 | 757 | **990** | 693 |
| Best model | 0 | 0 | 0 | 0 | 151 | **126** | 681 |
|  | BM1 | BMS | OU1 | OUM | **OUMA** | OUMV | OUMVA |
| Fittings | 761 | 761 | 761 | 761 | **761** | 757 | 593 |
| Best model | 0 | 0 | 0 | 0 | **151** | 18 | 583 |
|  | BM1 | BMS | OU1 | **OUM** | OUMA | OUMV | OUMVA |
| Fittings | 1000 | 1000 | 1000 | **1000** | 761 | 990 | 698 |
| Best model | 0 | 0 | 0 | **0** | 151 | 126 | 686 |
|  | BM1 | BMS | **OU1** | OUM | OUMA | OUMV | OUMVA |
| Fittings | 1000 | 1000 | **1000** | 1000 | 761 | 990 | 698 |
| Best model | 0 | 0 | **0** | 0 | 151 | 126 | 686 |
|  | BM1 | **BMS** | OU1 | OUM | OUMA | OUMV | OUMVA |
| Fittings | 1000 | **1000** | 1000 | 1000 | 761 | 990 | 698 |
| Best model | 0 | **0** | 0 | 0 | 151 | 126 | 686 |
|  | **BM1** | BMS | OU1 | OUM | OUMA | OUMV | OUMVA |
| Fittings | **1000** | 1000 | 1000 | 1000 | 761 | 990 | 698 |
| Best model | **0** | 0 | 0 | 0 | 151 | 126 | 686 |

Figure S8. Parameter estimates when OUMVA, OUMV and OUMA were chosen as the best models (686, 126, 151 simmaps among the 698, 990, 761 simmaps each model was respectively able to be fitted to) in analyses of body size evolution under the two-categories scheme. Each dot represents analyses performed in distinct simmaps. For better visualization we excluded extreme values and numbers on the top represent the proportion of values included. Because σ2 values estimated under OUMV model span two orders of magnitude, we presented smaller values separately. It is important to point out that these two orders of magnitude of σ2 estimates represent distinct samples of simmaps and both recovered the same pattern estimated under OUMVA, with arboreal vipers associated with smaller sigma values.

Figure S9. Simulated (light red curves) body size values using parameters estimated under each of the most frequently chosen models (OUMVA, OUMV and OUMA) (see supplementary methods for details) compared to empirical body size values in each microhabitat category.

Figure S10. Parameter estimates obtained using OUwie.boot for body size. The OUwie.boot analyses were performed 10 times across 100 simmaps suggesting OUMVA as the best model in OUwie analyses of body size evolution. For better visualization we excluded extreme values and numbers on the top represent the proportion of values included. Y-axes showing α and σ2 estimates were standardized given the disparity in magnitude between different OUwie.boot runs.

Table S4. Number of fittings for each model (number at the top, total of 1000 simmaps) and the respective number each model was chosen as the best model (number at the bottom) in the analyses of relative mid-body circumference evolution under the four-categories scheme. Each line represents the fitting, best model, and tie (ΔAICc less than two) frequency with respect to the sample of simmaps fitted for each model separately (shaded). The best model frequency in each line does not sum the number of fittings of each reference model (in the first line example, 467) because some simmaps did not suggest a best model.

|  | BM1 | BMS | OU1 | OUM | OUMA | OUMV | **OUMVA** |
| --- | --- | --- | --- | --- | --- | --- | --- |
| Fittings | 467 | 467 | 467 | 467 | 359 | 467 | **467** |
| Best model | 0 | 0 | 0 | 31 | 41 | 1 | **190** |
| Ties |  |  |  |  |  |  | **170** |
|  | BM1 | BMS | OU1 | OUM | OUMA | **OUMV** | OUMVA |
| Fittings | 998 | 998 | 998 | 997 | 765 | **998** | 467 |
| Best model | 0 | 0 | 0 | 99 | 284 | **42** | 190 |
| Ties |  |  |  |  |  | **192** |  |
|  | BM1 | BMS | OU1 | OUM | **OUMA** | OUMV | OUMVA |
| Fittings | 765 | 765 | 765 | 765 | **765** | 765 | 359 |
| Best model | 0 | 0 | 0 | 39 | **284** | 21 | 122 |
| Ties |  |  |  |  | **279** |  |  |
|  | BM1 | BMS | OU1 | **OUM** | OUMA | OUMV | OUMVA |
| Fittings | 998 | 998 | 998 | **998** | 765 | 997 | 467 |
| Best model | 0 | 0 | 0 | **100** | 284 | 41 | 190 |
| Ties |  |  |  | **211** |  |  |  |
|  | BM1 | BMS | **OU1** | OUM | OUMA | OUMV | OUMVA |
| Fittings | 1000 | 1000 | **1000** | 998 | 765 | 998 | 467 |
| Best model | 0 | 0 | **1** | 100 | 284 | 42 | 190 |
| Ties |  |  | **0** |  |  |  |  |
|  | BM1 | **BMS** | OU1 | OUM | OUMA | OUMV | OUMVA |
| Fittings | 1000 | **1000** | 1000 | 998 | 765 | 998 | 467 |
| Best model | 0 | **0** | 1 | 100 | 284 | 42 | 190 |
| Ties |  | **0** |  |  |  |  |  |
|  | **BM1** | BMS | OU1 | OUM | OUMA | OUMV | OUMVA |
| Fittings | **1000** | 1000 | 1000 | 998 | 765 | 998 | 467 |
| Best model | **0** | 0 | 1 | 100 | 284 | 42 | 190 |
| Ties | **0** |  |  |  |  |  |  |

Figure S11. Parameter estimates when OUMVA, OUMA and OUM were chosen as the best models (190, 284, 100 simmaps among the 467, 765, 998 simmaps each model was respectively able to be fitted to) in the analyses of mid-body circumference evolution under the four-categories scheme. Each dot represents analyses performed in distinct simmaps. For better visualization we excluded extreme values and numbers on the top represent the proportion of values included.

Table S5. Number of fittings for each model (number at the top, total of 1000 simmaps) and the respective number each model was chosen as the best model (number at the bottom) in the the analyses of mid-body circumference evolution under the two-categories scheme. Each line represents the fitting, best model, and and tie (ΔAICc less than two) frequency with respect to the sample of simmaps fitted for each model separately (shaded). The best model frequency in each line does not sum the number of fittings of each reference model (in the first line example, 850) because some simmaps did not suggest a best model.

|  | BM1 | BMS | OU1 | OUM | OUMA | OUMV | **OUMVA** |
| --- | --- | --- | --- | --- | --- | --- | --- |
| Fittings | 850 | 850 | 850 | 850 | 832 | 850 | **850** |
| Best model | 0 | 0 | 0 | 1 | 10 | 0 | **196** |
| Ties |  |  |  |  |  |  | **581** |
|  | BM1 | BMS | OU1 | OUM | OUMA | **OUMV** | OUMVA |
| Fittings | 998 | 998 | 998 | 998 | 960 | **998** | 850 |
| Best model | 0 | 0 | 0 | 4 | 80 | **0** | 196 |
| Ties |  |  |  |  |  | **234** |  |
|  | BM1 | BMS | OU1 | OUM | **OUMA** | OUMV | OUMVA |
| Fittings | 960 | 960 | 960 | 960 | **960** | 960 | 832 |
| Best model | 0 | 0 | 0 | 1 | **80** | 0 | 187 |
| Ties |  |  |  |  | **687** |  |  |
|  | BM1 | BMS | OU1 | **OUM** | OUMA | OUMV | OUMVA |
| Fittings | 1000 | 1000 | 998 | **998** | 960 | 998 | 850 |
| Best model | 0 | 0 | 0 | **4** | 80 | 0 | 196 |
| Ties |  |  |  | **445** |  |  |  |
|  | BM1 | BMS | **OU1** | OUM | OUMA | OUMV | OUMVA |
| Fittings | 1000 | 1000 | **1000** | 998 | 960 | 998 | 850 |
| Best model | 0 | 0 | **2** | 4 | 80 | 0 | 196 |
| Ties |  |  | **0** |  |  |  |  |
|  | BM1 | **BMS** | OU1 | OUM | OUMA | OUMV | OUMVA |
| Fittings | 1000 | **1000** | 1000 | 998 | 960 | 998 | 850 |
| Best model | 0 | **0** | 2 | 4 | 80 | 0 | 196 |
| Ties |  | **0** |  |  |  |  |  |
|  | **BM1** | BMS | OU1 | OUM | OUMA | OUMV | OUMVA |
| Fittings | **1000** | 1000 | 1000 | 998 | 960 | 998 | 850 |
| Best model | **0** | 0 | 2 | 4 | 80 | 0 | 196 |
| Ties | **0** |  |  |  |  |  |  |

Figure S12. Parameter estimates when OUMVA and OUMA were chosen as best models (196 and 80 simmaps among the 850 and 960 simmaps each model was respectively able to be fitted to) in the analyses of mid-body circumference evolution under the two-categories scheme. Each dot represents analyses performed in distinct simmaps. For better visualization we excluded extreme values and numbers on the top represent the proportion of values included. Because α values estimated under OUMA model span two orders of magnitude, we presented smaller values separately.

Figure S13. Simulated (light red curves) values of relative mid-body circumference and relative tail length using parameters estimated under OUMVA (see supplementary methods for details) compared to empirical values in each microhabitat category.

Figure S14. Parameter estimates obtained using OUwie.boot for relative mid-body circumference and relative tail length. OUwie.boot analyses were performed 10 times across 100 simmaps suggesting OUMVA as the best model in OUwie analyses of relative mid-body circumference and relative tail length evolution. For better visualization we excluded extreme values and numbers on the top represent the proportion of values included. Y-axes showing α and σ2 estimates were standardized given the disparity in magnitude between different OUwie.boot runs.

Table S6. Number of fittings for each model (number at the top, total of 1000 simmaps) and the respective number each model was chosen as the best model (number at the bottom) in the analyses of relative tail length evolution under the four-categories scheme. Each line represents the fitting, best model and tie (ΔAICc less than two) frequency with respect to the sample of simmaps fitted for each model separately (shaded). The best model frequency in each line does not sum the number of fittings of each reference model (in the first line example, 652) because some simmaps did not suggest a best model.

|  | BM1 | BMS | OU1 | OUM | OUMA | OUMV | **OUMVA** |
| --- | --- | --- | --- | --- | --- | --- | --- |
| Fittings | 652 | 652 | 652 | 652 | 307 | 652 | **652** |
| Best model | 0 | 0 | 0 | 39 | 54 | 1 | **383** |
| Ties |  |  |  |  |  |  | **138** |
|  | BM1 | BMS | OU1 | OUM | OUMA | **OUMV** | OUMVA |
| Fittings | 1000 | 1000 | 1000 | 1000 | 440 | **1000** | 652 |
| Best model | 0 | 0 | 0 | 218 | 141 | **9** | 383 |
| Ties |  |  |  |  |  | **78** |  |
|  | BM1 | BMS | OU1 | OUM | **OUMA** | OUMV | OUMVA |
| Fittings | 440 | 440 | 440 | 440 | **440** | 440 | 307 |
| Best model | 0 | 0 | 0 | 29 | **141** | 3 | 136 |
| Ties |  |  |  |  | **114** |  |  |
|  | BM1 | BMS | OU1 | **OUM** | OUMA | OUMV | OUMVA |
| Fittings | 1000 | 1000 | 1000 | **1000** | 440 | 1000 | 652 |
| Best model | 0 | 0 | 0 | **218** | 141 | 9 | 383 |
| Ties |  |  |  | **190** |  |  |  |
|  | BM1 | BMS | **OU1** | OUM | OUMA | OUMV | OUMVA |
| Fittings | 1000 | 1000 | **1000** | 1000 | 440 | 1000 | 652 |
| Best model | 0 | 0 | **0** | 218 | 141 | 9 | 383 |
| Ties |  |  | **0** |  |  |  |  |
|  | BM1 | **BMS** | OU1 | OUM | OUMA | OUMV | OUMVA |
| Fittings | 1000 | **1000** | 1000 | 1000 | 440 | 1000 | 652 |
| Best model | 0 | **0** | 0 | 218 | 141 | 9 | 383 |
| Ties |  | **0** |  |  |  |  |  |
|  | **BM1** | BMS | OU1 | OUM | OUMA | OUMV | OUMVA |
| Fittings | **1000** | 1000 | 1000 | 1000 | 440 | 1000 | 652 |
| Best model | **0** | 0 | 0 | 218 | 141 | 9 | 383 |
| Ties | **0** |  |  |  |  |  |  |

Figure S15. Parameter estimates when OUMVA, OUMA and OUM were chosen as the best models (383, 141, 218 simmaps among the 652, 440, 1000 simmaps each model was respectively able to be fitted to) in the analyses of relative tail length evolution under the four-categories scheme. Each dot represents analyses performed in distinct simmaps. For better visualization we excluded extreme values and numbers on the top represent the proportion of values included.

Table S7. Number of fittings for each model (number at the top, total of 1000 simmaps) and the respective number each model was chosen as the best model (number at the bottom) in the analyses of relative tail length evolution under the two-categories scheme. Each line represents the fitting, best model, and tie (ΔAICc less than two) frequency with respect to the sample of simmaps fitted for each model separately (shaded). The best model frequency in each line does not sum the number of fittings of each reference model (in the first line example, 967) because some simmaps did not suggest a best model.

|  | BM1 | BMS | OU1 | OUM | OUMA | OUMV | **OUMVA** |
| --- | --- | --- | --- | --- | --- | --- | --- |
| Fittings | 967 | 967 | 967 | 967 | 941 | 967 | **967** |
| Best model | 0 | 0 | 0 | 17 | 26 | 0 | **211** |
| Ties |  |  |  |  |  |  | **500** |
|  | BM1 | BMS | OU1 | OUM | OUMA | **OUMV** | OUMVA |
| Fittings | 1000 | 1000 | 1000 | 1000 | 972 | **1000** | 967 |
| Best model | 0 | 0 | 0 | 17 | 47 | **0** | 211 |
| Ties |  |  |  |  |  | **307** |  |
|  | BM1 | BMS | OU1 | OUM | **OUMA** | OUMV | OUMVA |
| Fittings | 972 | 972 | 972 | 972 | **972** | 972 | 941 |
| Best model | 0 | 0 | 0 | 16 | **47** | 0 | 192 |
| Ties |  |  |  |  | **653** |  |  |
|  | BM1 | BMS | OU1 | **OUM** | OUMA | OUMV | OUMVA |
| Fittings | 1000 | 1000 | 1000 | **1000** | 972 | 1000 | 967 |
| Best model | 0 | 0 | 0 | **17** | 47 | 0 | 211 |
| Ties |  |  |  | **406** |  |  |  |
|  | BM1 | BMS | **OU1** | OUM | OUMA | OUMV | OUMVA |
| Fittings | 1000 | 1000 | **1000** | 1000 | 972 | 1000 | 967 |
| Best model | 0 | 0 | **0** | 17 | 47 | 0 | 211 |
| Ties |  |  | **0** |  |  |  |  |
|  | BM1 | **BMS** | OU1 | OUM | OUMA | OUMV | OUMVA |
| Fittings | 1000 | **1000** | 1000 | 1000 | 972 | 1000 | 967 |
| Best model | 0 | **0** | 0 | 17 | 47 | 0 | 211 |
| Ties |  | **0** |  |  |  |  |  |
|  | **BM1** | BMS | OU1 | OUM | OUMA | OUMV | OUMVA |
| Fittings | **1000** | 1000 | 1000 | 1000 | 972 | 1000 | 967 |
| Best model | **0** | 0 | 0 | 17 | 47 | 0 | 211 |
| Ties | **0** |  |  |  |  |  |  |

Figure S16. Parameter estimates when OUMVA, OUMA and OUM were chosen as the best models (211, 47, 17 simmaps among the 967, 972, 1000 simmaps each model was respectively able to be fitted to) in the analyses of relative tail length evolution under the two-categories scheme. Each dot represents analyses performed in distinct simmaps. For better visualization we excluded extreme values and numbers on the top represent the proportion of values included.

Figure S17. Posterior distributions of extinction and net diversification rates estimated for arboreal and terrestrial lineages. Bars represent 95% HPD interval and dots represent medians.

Figure S18. Posterior distributions of transition rates estimated among arboreal and terrestrial lineages in MuSSE analyses.

Figure S19. Posterior predictive simulations showing the proportion of each microhabitat state recovered by simulated trees and the empirical proportion found in vipers (red dot).

Table S8. Number of trees (from the 100 analysed) for which each model was selected as the best model in HiSSE analyses.

| **Model** | **Number of Trees** |
| --- | --- |
| Single-rate birth-death ("Full null") | 63 |
| Hidden-state only | 16 |
| BiSSE | 0 |
| HiSSE | 21 |

**Supplementary Methods**

*Microhabitat categorization*. Some viper species that occur in arboreal microhabitats can also be frequently found on the ground and, thus, could be considered as “semi-arboreal”. However, arboreal and semi-arboreal vipers seem to be closely related in their morphospace (see the morphospace below, 11 semi-arboreal species are shown), suggesting they share the same morphological syndromes, and thus, the potential selective pressures imposed by the arboreal environment might also affect semi-arboreal lineages. Moreover, semi-arboreal vipers comprise only 17 species in the phylogeny and would represent a very species-poor microhabitat category, which would negatively affect the performance of the methodological approaches used to study the phenotypic and species diversification between different ecological regimes (e.g., Davis *et al*. 2013). Therefore, we decided to include “semi-arboreal” vipers in the “arboreal” category. We also note that such treatment of the “semi-arboreal” species is more conservative with respect to our morphological evolution hypothesis. We also categorized *Agkistrodon piscivorus*, a species sometimes considered as semi-aquatic (e.g., Vincent *et al*. 2005), as a terrestrial species.

a) Morphospace of arboreal, semi-arboreal (11 species shown), and terrestrial vipers; morphospace was generated using the three morphological measurements analysed in the present study (snout-vent length, tail length, mid-body circumference). PC1 and PC2 explain 97% of trait variance. Traits were log-transformed prior to PCA analysis.

*Stochastic character mapping (simmaps).* We used stochastic character mapping (Simmap, R package Phytools) to reconstruct the evolutionary history of microhabitat in vipers and assign categories to the internal branches of the phylogenetic trees. We first fitted three different continuous-time Markov models of trait evolution (“all rates different”, “symmetric rates” and “all rates equal”) (see Harmon et al. 2008) across our 100 posterior randomly chosen trees and species microhabitat information to evaluate which one best explained our dataset. For each one of the posterior trees, we set the root state to be sampled from the conditional scaled-likelihood distribution at the root and transition-rate matrix (Q) to be empirically estimated (Revell, 2012); this means that the “make.simmap” function fits a continuous-time Markov model first, and then simmaps are simulated. We simulated 10 maps for each of the 100 phylogenetic trees using a fixed estimated value of the transition-rate matrix for each phylogenetic tree (see the help page for the “make.simmap” function).

We performed Simmap analyses for both microhabitat categorization schemes (four states and two states). However, when generating simmaps under the four-state scheme, the “make.simmap” function could not estimate character histories under the best Markov model chosen (“all rates different”) for 10 out of the 100 trees. In those cases, we chose to use a simpler Markov model instead. In total, we generated 1000 simmap trees for each microhabitat categorization scheme incorporating phylogenetic and ancestral estimates uncertainty in trait evolution analyses.

*Morphological* *data* *collection*. To characterize the morphology of as many viper species as possible, we analysed specimens that were deposited in several herpetological collections: Smithsonian National Museum of Natural History, The American Museum of Natural History, The Field Museum of Natural History, California Academy of Sciences, University of Texas at Arlington, Florida Museum of Natural History, The British Museum of Natural History, Muséum National d’histoire Naturelle–Paris, The Raffles Museum of Biodiversity Research of the National University of Singapore, Butantan Institute, Museum of Zoology of the University of São Paulo and National Museum of Rio de Janeiro. Ideally, we aimed to include measurements from at least five adult males from each species. We determined a specimen to be an adult using two different approaches. First, we considered as an adult male, specimens larger than the smallest mature male described for a given species (see Valdujo et al. 2002 for an example). Unfortunately, this valuable information is not available for several vipers. In those cases, we used the adult snout-vent lengths reported in the literature for a given species as a reference value used to choose which individuals to measure. It is important to note, however, that several viper specimens were damaged making the collection of realiable measurements impossible. Additionally, many species are very rare in the visited collections or in collections in general. We also avoided measuring individuals with uncertainty in sex determination or suspicious identification. For this reason, the number of specimens varied for each species, and for some species only one or two specimens could be measured. We believe, however, that the measurements included in the present study are good proxies for the morphology of adult males of each species. Nevertheless, species with sample sizes smaller than three individuals are distributed across all microhabitat categories; thus, it is unlikely they biased our results. When more than one individual was measured, we used the average of each species. All measurements were log transformed (base 10) prior to analyses.

*Female morphological data*. In the present study we used morphological measurements that were mostly taken from male specimens. However, for 16 species out of 248, we only had access to female specimens, and we chose to keep their morphological data in the trait evolution analyses. We argue that including these female measurements did not bias our results for several reasons.

These 16 species are not restricted to a single microhabitat; rather, they are distributed across all microhabitat categories (at least regarding body size and tail length, see Table S1). Female data for mid-body circumference comprise all microhabitat categories, with the exception of the forested and open category (table S1). However, as far as we know, sexual dimorphism in body circumference is not a common trend among snakes. Additionally, we estimated sexual size dimorphism in body size of vipers for which we had information for at least two males and two females and used mean snout-vent length as a proxy for body size (calculation done following Hendry *et al*. 2014).

Although male-biased sexual dimorphism (MBSSD) occurs among vipers, differences between the sexes are concentrated mostly below 10%, meaning that, for most species, females are usually only 10% smaller than males. Additionally, a higher degree of MBSSD (> 0.1) is mostly concentrated in the genus *Crotalus* (also suggested by Hendry *et al*. 2014 for total length),which represents only one species in the female samples used in trait evolution analyses (see the MBSSD figure below).

b) Male-biased sexual size dimorphism among vipers (MBSSD = -[(larger sex/ smaller sex) - 1]) relative to female body size (R2 = 0.004, p = 0.56). Red circles indicate species belonging to the genus *Crotalus*. Variables were log10 transformed prior to the analysis. This plot was constructed using only the species where males are larger than females.

In contrast, female-biased sexual size dimorphism (FBSSD) is more widespread in vipers and is suggested to predominantly occur among arboreal NW vipers (Hendry *et al*. 2014); however, most values are concentrated below 0.2 (see the FBSSD figure below). Additionally, extreme values (> 0.2) seem to occur among species attaining female body sizes larger than 500 mm. Six of the 16 species we included in our analyses are small in size (smaller than 500 mm, see table S1) and probably would not show extreme values of female-biased sexual size dimorphism. Although 10 species comprise female body sizes larger than 500 mm, these species are not restricted to a single microhabitat category: one is terrestrial, occurring in both forested and open microhabitats; one is terrestrial, restricted to open microhabitats; three are terrestrial, restricted to forests; and five are arboreal.

c) Female-biased sexual size dimorphism among vipers (FBSSD = (larger sex/smaller sex)-1), relative to female body size. A) Including the larger species *Lachesis stenophrys* in our sample (R2 = 0.03, p = 0.04). B) Excluding *Lachesis stenophrys* (R2 = 0.04, p = 0.01). Variables were log10 transformed prior to the analysis. This plot was constructed using only the species where females are larger than males.

Finally, using a two-sample Wilcoxon test, we evaluated if body size significantly differed between sexes in species that are phylogenetically related to the 16 for which we used female measurements based on the phylogenetic tree presented in Alencar *et al*. (2016). From these 16 species, 10 are phylogenetic related to species that do not present significant body size differences between sexes (p = 1.00 - 0.15). Although six are phylogenetically related to species that present significant intersexual differences in body size (p = 0.030 - 0.002), all are female-biased, three are terrestrials and restricted to forests and the other three are arboreals and, thus, are not restricted to a single microhabitat category. Given the above considerations, we suggest that it is very unlikely that using female body size measurements for these 16 species would have biased our results towards a more constrained body size in arboreal species.

Sexual size dirmorphism for tail length is a well-known pattern among snakes, with males attaining longer tails than females (see King, 1989). Although the species comprising female morphological data are not restricted to a single microhabitat category, we also ran OUwie analyses for tail length without these species. The results were similar (not shown), but uncertainty regarding the best model increased after removing female data (four-microhabitat categories: 25% of the simmaps without a best model; four-microhabitat categories excluding female data: 46% of the simmaps without a best model; two-microhabitat categories: 73% of the simmaps without a best model; two-microhabitat categories excluding female data: 84% of the simmaps without a best model).

*Inaccurate fittings in OUwie.* Fittings of OUMA and OUMVA models frequently returnedinaccurate estimates associated with negative eigenvalues (i.e., parameters were not reliably estimated), or sometimes unrealistic estimated optima (e.g., values falling far beyond the empirical values). We considered biologically feasible optima that were within or close to the interval of the empirical values for BS, RCIRC, and RTL (figure S4, S5 and S6). Failing to adequately fit models with varying α in certain simmaps have been reported before (Price & Hopkins 2015, Moen *et al*. 2016) and these failings are likely to be related to very complex estimated character histories, which renders OUwie without enough data to infer morphological evolution under these models (e.g., limited number of tips in the phylogenetic tree for very complex histories). Previous studies (Price & Hopkins 2015; Moen *et al*. 2016) have simply removed complex models from the analysis. However, because estimating the α parameter would greatly improve the evaluation of our trait evolution hypothesis, we decided to keep these complex models in our analyses whenever possible.

*Model Adequacy Tests*. Regarding body size, we first randomly selected 300 simmap trees used in the OUwie analyses for which the best model was one of the three complex models (100 simmap trees for OUMVA, 100 for OUMV and 100 for OUMA). Collectively, these explain the vast majority of our estimates. By sorting these 300 simmaps with equal probabilities (an uniform distribution), we expected that the proportion of these 300 root states would follow those estimated for the 1000. We then simulated 100 continuous traits for each of the 300 simmap trees using the corresponding empirical parameter values (θ, σ2 and α) estimated by OUwie under the best model chosen for each tree (OUMVA, OUMV or OUMA) and compared the resulting body size distribution to the empirical distribution. By doing this, we explored if simulated values (estimated based on empirical parameters) recovered empirical body size values, which allowed us to evaluate the adequacy of the best-chosen models. Regarding relative tail length and mid-body circumference, we followed this same procedure but sampled 100 simmaps used only in OUwie analyses for which the best model was OUMVA. We performed model adequacy tests for OUwie analyses under the four-category scheme only.

*OUwie.boot analyses*. We used the parametric bootstrapping function OUwie.boot, which is available in the OUwie package, to evaluate if using the simulated trait values produced empirical trait-evolution patterns for arboreal lineages. Generally, OUwie.boot analyses provide an idea regarding the uncertainty surrounding empirical parameter estimates and can be used, for example, to calculate parameter confidence intervals. We fitted the OUMVA model over the values of body size, relative tail length and relative mid-body circumference that were simulated using the empirical OUwie estimates and corresponding simmap trees. That is, we expected that parameter patterns (θ, σ2 and α) would reflect those found in our empirical analyses. We performed OUwie.boot 10 times for 100 randomly chosen simmaps that suggested OUMVA was the best model for the evolution of body size, relative tail length and relative mid-body circumference in vipers under the four-category scheme only.

*Posterior Predictive Simulations (MuSSE)*. The performance of the state-dependent speciation extinction models (xxSSE models) has been criticized (Maddison & FitzJohn 2014; Rabosky & Goldberg 2015). The major concerns of xxSSE models are related to these models showing high type I error. Even though our results do not show any associations between diversification rates and microhabitats (see Results), our parameter estimates could still be compromised by model inadequacy (Rabosky & Goldberg 2015). We simulated 1000 trees using the empirical number of states (four) and the median of the posterior distribution of each parameter estimated in MuSSE analyses using the trait-dependent simulation function tree.musse (diversitree R package, FitzJohn 2012). We set the root states in the simulations to be proportional to the empirical proportion of each state (i.e., each microhabitat) observed in the empirical dataset. We then calculated the proportion of states (arboreal and the three terrestrial categories) recovered in each simulated tree and compared this proportion to the empirical distribution. By doing this, we could check if the proportion of empirical states was within the values delimited by the simulated proportions, i.e., if simulated proportions can generate realistic predictions about trait-state proportions.

*HiSSE analyses*. Null models in xxSSE models unreliably assume equal rates across the tree, whereas unequal rates might be a more realistic scenario (Beaulieu and O'Meara, 2016). To incorporate a proper null model when comparing species diversification regimes among microhabitats, we performed additional analyses using the R package HiSSE (Beaulieu and O'Meara, 2016). We fitted four different models to 100 randomly sampled trees from the 200 previously used in MuSSE analyses. Using a binary categorization of terrestrial vs arboreal vipers, we fitted four different models: (1) a single-rate birth-death model, i.e., a single speciation and extinction rate driving the diversification of the group independently of the microhabitat; (2) a BiSSE model, i.e., diversification rates are dependent on the microhabitat; (3) a hidden-state birth-death model, i.e., diversification rates are dependent on a hidden state (but not microhabitat), and (4) the full HiSSE model, i.e., a model with a binary-state dependent diversification and a hidden trait that might also affect the diversification rates, either enhancing the signal, erasing the signal or even creating “false” differences.

**Supplementary results**

*Body size evolution (model adequacy and OUwie.boot)*. Simulations performed using the empirical parameters that were estimated under the frequently chosen OUwie models produced body size values that were similar to empirical values (figure S9). When analysing simulated body size values, OUwie still recovered arboreal microhabitats with higher α and lower σ2 than terrestrial microhabitats (figure S10). There was, however, great uncertainty in θ estimates for terrestrial categories, with θ either attaining higher or lower values relative to those estimated for the arboreal microhabitat (figure S10).

*Mid-body circumference evolution (model adequacy and OUwie.boot).* Simulations performed using empirical parameters that were estimated under OUMVA produced RCIRC values similar to empirical values (figure S13). When analysing simulated values of RCIRC, OUwie still recovered lower θ and higher α for lineages that evolved in arboreal microhabitats compared to those that evolved in terrestrial microhabitats (figure S14).

*Tail length evolution (model adequacy and OUwie.boot).* Simulations performed using the empirical parameters that were estimated under OUMVA produced RTL values similar to empirical ones (figure S13). When analysing the simulated RTL, OUwie still recovered higher θ values for arboreal lineages, and no substantial differences were detected between α and σ2 values in arboreal and terrestrial categories (figure S14).

*Posterior predictive simulations (MuSSE) and HiSSE analyses.* Our posterior predictive simulations indicated that the rate values obtained in MuSSE analyses represent a plausible evolutionary scenario, since the distribution of trait-state proportions from simulated trees encompassed the trait-state proportions observed in our data (figure S19). Additionally, HiSSE analyses suggested that the single-rate birth-death model and the hidden-state null model together represented the best models for most trees (79% in total, 63% and 16% for each model, respectively). Thus, the HiSSE results support our findings that there is no difference between arboreal and terrestrial microhabitats regarding speciation or extinction rates (table S8).

**Supplementary Discussion**

*Alpha values and phylogenetic half-lives*. One could argue that the α values produced in the present study might be too small compared to other studies (e.g., Lapiedra *et al*. 2013), which could possibly suggest that the processes described here do not differ from a Brownian-like process (see Cooper *et al*. 2016) and that the differences found between arboreal and terrestrial habitats would be negligible. However, as suggested by Cressler *et al*. (2015), the interpretation and comparison of α and σ2 between studies is complicated because of their dependence on time and the trait being studied. Snakes have less varied morphology than other animals, and thus, the magnitude and direction that their body size has to evolve will undoubtedly be more limited. To determine if the estimated α correspond to meaningful values, it is more interesting to interpret α values relative to the height of the phylogenetic tree used in the study by estimating the phylogenetic half-life (t1/2): ln(2)/α (Ho & Ané 2014; Cooper *et al*. 2016). The phylogenetic half-life measures the time an ancestral phenotype takes to evolve halfway towards the optimum after a lineage invades a new selective regime (in our case, a different microhabitat). Thus, if t1/2 is extremely large relative to the tree height, it suggests that the OU process may be extremely weak (Cooper *et al*. 2016). Among vipers, t1/2 of body size in arboreal microhabitats comprise much shorter times (8.91 or 16.68 mya, see the table below) than the stem age of most arboreal lineages (~25-35 mya, see Alencar *et al*. 2016) and are even shorter compared to the tree height of vipers (~50 mya crown group, see Alencar *et al*. 2016). The phylogenetic half-lives of terrestrial microhabitats are comparatively larger, suggesting that body size evolves at least two times faster towards the optimum in arboreal microhabitats than in terrestrial ones (see the table below). This difference is even more pronounced for the phylogenetic half-lives estimated when OUMVA was the best model. That is, α values in the present study seem to comprise plausible estimates, providing evidence that different evolutionary processes are associated with the evolution of body size in arboreal compared to terrestrial vipers.

Median of phylogenetic half lives (ln(2)/α) estimated for each microhabitat category across simmaps suggesting OUMVA or OUMA as best models describing body size evolution. Mya: million of years ago.

|  | **Terrestrial forested and open microhabitats** | **Terrestrial open microhabitats** | **Terrestrial forested microhabitats** | **Arboreal microhabitats** |
| --- | --- | --- | --- | --- |
|  |
| **OUMVA** | 49.42 | 34.12 | 41.08 | 8.91 |
| **OUMA** | 49.12 | 29.92 | 40.1 | 16.68 |

**Supplementary References**

Alencar LRV, Quental TB, Grazziotin FG, Alfaro ML, Martins M, Venzon M, Zaher H. 2016 Diversification in vipers: phylogenetic relationships, time of divergence and shifts in speciation rates. *Mol. Phylogenet. Evol.,* 105, 50-62.

Beaulieu JM, O’Meara BC. 2016. Detecting hidden diversification shifts in models of trait-dependent speciation and extinction. *Syst. Biol*., 65, 583-601. (doi: 10.1093/sysbio/syw022)

Cooper N, Thomas GH, Venditti C, Meade A, Freckleton RP. 2016. A cautionary note on the use of Ornstein Uhlenbeck models in macroevolutionary studies. *Biol. J. Linn. Soc.*, 118, 64-77.

Cressler CE, Butler MA, King AA. 2015 Detecting adaptive evolution in phylogenetic comparative analysis using the Ornstein-Uhlenbeck model. *Syst. Biol.*, 64, 953-968.

Davis MP, Midford PE, Maddison W. 2013 Exploring power and parameter estimation of the BiSSE method for analyzing species diversification. *BMC Evolutionary Biology*, 13, 1-11.

FitzJohn RG. 2012 Diversitree: comparative phylogenetic analyses of diversification in R. *Methods Ecol. Evol.,* 33, 1084-1092.

Harmon LJ, Weir JT, Brock CD, Glor RE, Challenger W. 2008 GEIGER: investigating evolutionary radiations. *Bioinformatics*, 24, 129-131.

Hendry CR, Guiher TJ, Pyron RA. 2014 Ecological divergence and sexual selection drive sexual size dimorphism in new world pitvipers (Serpentes: Viperidae). *J. Evol.Biol.*, 27, 760-771.

Ho LST, Ané C. 2014 Intrinsic inference difficulties for trait evolution with Ornstein-Uhlenbeck models. *Methods Ecol. Evol.*, 5, 1133-1146.

King RB. 1989. Sexual dimorphism in snake tail length: sexual selection, natural selection, or morphological constraint?. *Biol. J. Linn. Soc.*, 38, 133-154.

Lapiedra O, Sol D, Carranza S, Beaulieu JM. 2013. Behavioral changes and the adaptive diversification of pigeons and doves. *Proc. R. Soc. B*, 280, 1-9.

Maddison WP, FitzJohn RG. 2014 The unresolved challenge to phylogenetic correlation tests for categorical characters. *Syst. Biol.*, 64, 127-136.

Moen DS, Morlon H, Wiens JJ. 2016. Testing convergence versus history: convergence dominates phenotypic evolution for over 150 million years in frogs. *Syst. Biol*, 65, 146-160.

Price SA, Hopkins SSB. 2015 The macroevolutionary relationship between diet and body mass across mammals. *Biol. J. Linn. Soc.*, 115, 173-184.

Rabosky DL, Goldberg EE. 2015 Model inadequacy and mistaken inferences of trait-dependent speciation. *Syst. Biol.*, 64, 340-355.

Revell LJ. 2012 Phytools: an R package for phylogenetic comparative biology (and other things). *Methods Ecol. Evol.*, 3, 217-223.

Valdujo PH, Nogueira C, Martins M. 2012. Ecology of *Bothrops neuwiedi pauloensis* (Serpentes: Viperidae: Crotalinae) in the Brazilian Cerrado. Journal of Herpetology, 36, 169-176.

Vincent SE, Herrel A, Irschick DJ. 2005 Comparisons of aquatic versus terrestrial predatory strikes in the pitviper, *Agkistrodon piscivorus*. *J. Exp. Biol.*, 303A, 476-488. (doi:10.1002/jez.a.179)

**Appendix I**

Museum specimens analysed in the present study. UTA = University of Texas at Arlington; CAS = California Academy of Sciences; FMNH = Field Museum of Natural History; AMNH = American Museum of National History; USNM = Smithsonian National Museum of Natural History; BMNH = Natural History Museum of London; MNHN = Muséum national d'Histoire naturelle; FLMNH = Florida Museum of Natural History; MNRJ = Museu Nacional do Rio de Janeiro; IBSP = Instituto Butantan; MZUSP = Museu de Zoologia da Universidade de São Paulo; ZRC = The Raffles Museum of Biodiversity Research of the National University of Singapore.

| **Species** | **Museum** | **Catalog number** |
| --- | --- | --- |
| *Agkistrodon_bilineatus* | UTA | R6359 |
| *Agkistrodon_bilineatus* | UTA | R2449 |
| *Agkistrodon_bilineatus* | CAS | 204153 |
| *Agkistrodon_bilineatus* | FMNH | 39093 |
| *Agkistrodon_contortrix* | AMNH | 128682 |
| *Agkistrodon_contortrix* | AMNH | 128678 |
| *Agkistrodon_contortrix* | AMNH | 95950 |
| *Agkistrodon_contortrix* | AMNH | 134673 |
| *Agkistrodon_contortrix* | AMNH | 146527 |
| *Agkistrodon_howardgloydi* | UTA | R59855 |
| *Agkistrodon_piscivorus* | USNM | 203553 |
| *Agkistrodon_piscivorus* | USNM | 203565 |
| *Agkistrodon_piscivorus* | USNM | 203566 |
| *Agkistrodon_piscivorus* | AMNH | 107946 |
| *Agkistrodon_piscivorus* | AMNH | 90128 |
| *Agkistrodon_piscivorus* | AMNH | 161861 |
| *Agkistrodon_taylori* | UTA | R8117 |
| *Agkistrodon_taylori* | FMNH | 28794 |
| *Agkistrodon_taylori* | AMNH | 124948 |
| *Atheris_ceratophora* | BMNH | 1960.1.6.54 |
| *Atheris_ceratophora* | CAS | 173812 |
| *Atheris_ceratophora* | CAS | 162615 |
| *Atheris_chlorechis* | BMNH | 1907.4.18.6 |
| *Atheris_chlorechis* | UTA | R58204 |
| *Atheris_desaixi* | BMNH | 1969. 2419 |
| *Atheris_desaixi* | BMNH | 979 |
| *Atheris_desaixi* | BMNH | 980 |
| *Atheris_desaixi* | UTA | R50162 |
| *Atheris_hispida* | CAS | 141750 |
| *Atheris_hispida* | CAS | 122747 |
| *Atheris_hispida* | CAS | 147906 |
| *Atheris_hispida* | FMNH | 154900 |
| *Atheris_hispida* | AMNH | 11873 |
| *Atheris_nitschei* | BMNH | 1954.1.12.65-66 |
| *Atheris_nitschei* | MNHParis | 1980.1278 |
| *Atheris_nitschei* | MNHParis | 1981.476 |
| *Atheris_nitschei* | MNHParis | 1934.14 |
| *Atheris_nitschei* | CAS | 201654 |
| *Atheris_nitschei* | CAS | 201655 |
| *Atheris_squamigera* | BMNH | 1934.12.1.35 |
| *Atheris_squamigera* | BMNH | 1901.6.24.65-66 |
| *Atheris_squamigera* | BMNH | 1908.5.30.35 |
| *Atheris_squamigera* | BMNH | 1908.5.30.33 |
| *Atheris_squamigera* | BMNH | 1969.2554-2556 |
| *Atheris_squamigera* | BMNH | 1908.10.20.25 |
| *Atheris_squamigera* | BMNH | 1907.5.22.66 |
| *Atheris_squamigera* | BMNH | 1906.5.28.84 |
| *Atropoides_indomitus* | UTA | R52952 |
| *Atropoides_mexicanus* | UTA | R6738 |
| *Atropoides_mexicanus* | UTA | R12943 |
| *Atropoides_mexicanus* | UTA | R43610 |
| *Atropoides_mexicanus* | UTA | R45500 |
| *Atropoides_mexicanus* | USNM | 578902 |
| *Atropoides_mexicanus* | FLMNH | 119441 |
| *Atropoides_mexicanus* | FLMNH | 141977 |
| *Atropoides_mexicanus* | FLMNH | 142074 |
| *Atropoides_mexicanus* | FLMNH | 144757 |
| *Atropoides_nummifer* | UTA | R24842 |
| *Atropoides_nummifer* | UTA | R6206 |
| *Atropoides_nummifer* | UTA | R12562 |
| *Atropoides_nummifer* | UTA | R51731 |
| *Atropoides_occiduus* | UTA | R34158 |
| *Atropoides_occiduus* | UTA | R12785 |
| *Atropoides_occiduus* | UTA | R9089 |
| *Atropoides_occiduus* | UTA | R31979 |
| *Atropoides_olmec* | UTA | R16964 |
| *Atropoides_olmec* | UTA | R25113 |
| *Atropoides_olmec* | UTA | R18691 |
| *Atropoides_picadoi* | BMNH | 1913.7.19.1.47 |
| *Atropoides_picadoi* | UTA | R18215 |
| *Atropoides_picadoi* | UTA | R24834 |
| *Atropoides_picadoi* | UTA | R24835 |
| *Atropoides_picadoi* | UTA | R32080 |
| *Azemiops_feae* | MNHParis | 1953.463 |
| *Azemiops_feae* | UTA | R35599 |
| *Azemiops_feae* | UTA | R32069 |
| *Azemiops_feae* | UTA | R18701 |
| *Azemiops_feae* | FMNH | 218627 |
| *Azemiops_feae* | FMNH | 152987 |
| *Bitis_arietans* | BMNH | 1936.7.3.39 |
| *Bitis_arietans* | BMNH | 1916.3.20.1 |
| *Bitis_arietans* | BMNH | 1906.8.25.3 |
| *Bitis_arietans* | BMNH | 90.2.26.15-17 |
| *Bitis_arietans* | BMNH | 1916.3.20.1 |
| *Bitis_arietans* | BMNH | 1975.1113 |
| *Bitis_arietans* | BMNH | 1975.1097 |
| *Bitis_arietans* | BMNH | 1948.1.2.35 |
| *Bitis_arietans* | MNHParis | 1904.205 |
| *Bitis_armata* | FMNH | 206280 |
| *Bitis_atropos* | BMNH | 1908.3.26.2 |
| *Bitis_atropos* | MNHParis | 323 |
| *Bitis_atropos* | UTA | R46188 |
| *Bitis_atropos* | UTA | R7325 |
| *Bitis_atropos* | CAS | 135749 |
| *Bitis_caudalis* | BMNH | 1969.2639 |
| *Bitis_caudalis* | BMNH | 1988.583 |
| *Bitis_caudalis* | BMNH | 65.5.4.153A |
| *Bitis_caudalis* | BMNH | 65.5.4.153B |
| *Bitis_caudalis* | CAS | 214702 |
| *Bitis_cornuta* | UTA | R34491 |
| *Bitis_cornuta* | UTA | R38536 |
| *Bitis_cornuta* | UTA | R34492 |
| *Bitis_cornuta* | UTA | R26613 |
| *Bitis_gabonica* | BMNH | 1969.526 |
| *Bitis_gabonica* | BMNH | 1908.3.4.2 |
| *Bitis_gabonica* | MNHParis | 1988.2441 |
| *Bitis_gabonica* | MNHParis | 1988.50 |
| *Bitis_gabonica* | FMNH | 216460 |
| *Bitis_gabonica* | FMNH | 30874 |
| *Bitis_nasicornis* | S/N |  |
| *Bitis_nasicornis* | BMNH | 1955.1.11.68-69 |
| *Bitis_nasicornis* | BMNH | 1932.2.3.1 |
| *Bitis_nasicornis* | MNHParis | 1899 |
| *Bitis_nasicornis* | MNHParis | 1988.3925 |
| *Bitis_nasicornis* | MNHParis | 1988.3923 |
| *Bitis_peringueyi* | BMNH | 1976.263 |
| *Bitis_peringueyi* | UTA | R25696 |
| *Bitis_peringueyi* | UTA | R25700 |
| *Bitis_peringueyi* | UTA | R25697 |
| *Bitis_peringueyi* | UTA | R39081 |
| *Bitis_peringueyi* | CAS | 111963 |
| *Bitis_rhinoceros* | MNHParis | 1986.105 |
| *Bitis_schneideri* | BMNH | 1967.594 |
| *Bitis_schneideri* | UTA | R25701 |
| *Bitis_xeropaga* | BMNH | 1976.87 |
| *Bitis_xeropaga* | FMNH | 233126 |
| *Bitis_worthingtoni* | BMNH | 1952.1.2.30-31 |
| *Bitis_worthingtoni* | BMNH | 1952.1.2.30-31 |
| *Bitis_worthingtoni* | FMNH | 58141 |
| *Bothriechis_aurifer* | UTA | R39070 |
| *Bothriechis_aurifer* | UTA | R50585 |
| *Bothriechis_aurifer* | UTA | R51728 |
| *Bothriechis_aurifer* | UTA | R6525 |
| *Bothriechis_aurifer* | UTA | R10434 |
| *Bothriechis_aurifer* | UTA | R26574 |
| *Bothriechis_aurifer* | UTA | R36211 |
| *Bothriechis_bicolor* | UTA | R24759 |
| *Bothriechis_bicolor* | UTA | R34156 |
| *Bothriechis_bicolor* | UTA | R2274 |
| *Bothriechis_bicolor* | FMNH | 20162 |
| *Bothriechis_guifarroi* | UTA | R60303 |
| *Bothriechis_lateralis* | BMNH | 96.10.8.18-19 |
| *Bothriechis_lateralis* | UTA | R51155 |
| *Bothriechis_lateralis* | UTA | R51154 |
| *Bothriechis_lateralis* | UTA | R7634 |
| *Bothriechis_lateralis* | UTA | R16351 |
| *Bothriechis_lateralis* | FLMNH | 54148 |
| *Bothriechis_lateralis* | FLMNH | 39820 |
| *Bothriechis_lateralis* | FLMNH | 70572 |
| *Bothriechis_lateralis* | FLMNH | 85322 |
| *Bothriechis_marchi* | UTA | R13034 |
| *Bothriechis_marchi* | UTA | R7159 |
| *Bothriechis_marchi* | UTA | R13617 |
| *Bothriechis_marchi* | UTA | R32068 |
| *Bothriechis_marchi* | UTA | R50571 |
| *Bothriechis_marchi* | FMNH | 37217 |
| *Bothriechis_marchi* | FMNH | 21892 |
| *Bothriechis_marchi* | AMNH | 46957 |
| *Bothriechis_marchi* | FLMNH | 144679 |
| *Bothriechis_marchi* | FLMNH | 52555 |
| *Bothriechis_marchi* | FLMNH | 52554 |
| *Bothriechis_nigroviridis* | UTA | R10433 |
| *Bothriechis_nigroviridis* | UTA | R24841 |
| *Bothriechis_nigroviridis* | FMNH | 154530 |
| *Bothriechis_nigroviridis* | FMNH | 154515 |
| *Bothriechis_nigroviridis* | USNM | 32580 |
| *Bothriechis_nigroviridis* | AMNH | 142203 |
| *Bothriechis_rowleyi* | UTA | R23954 |
| *Bothriechis_rowleyi* | UTA | R6207 |
| *Bothriechis_rowleyi* | UTA | R22243 |
| *Bothriechis_rowleyi* | UTA | R13619 |
| *Bothriechis_rowleyi* | UTA | R25703 |
| *Bothriechis_rowleyi* | UTA | R6636 |
| *Bothriechis_rowleyi* | AMNH | 102895 |
| *Bothriechis_rowleyi* | AMNH | 102894 |
| *Bothriechis_rowleyi* | FLMNH | 52553 |
| *Bothriechis_schlegelii* | MNRJ | 8794 |
| *Bothriechis_schlegelii* | UTA | R12957 |
| *Bothriechis_schlegelii* | USNM | 562913 |
| *Bothriechis_schlegelii* | AMNH | 35780 |
| *Bothriechis_schlegelii* | FLMNH | 157577 |
| *Bothriechis_supercilliaris* | UTA | R35246 |
| *Bothriechis_thalassinus* | UTA | R42259 |
| *Bothriechis_thalassinus* | UTA | R38891 |
| *Bothriechis_thalassinus* | UTA | R44438 |
| *Bothrocophias_campbelli* | AMNH | 22094 |
| *Bothrocophias_hyoprora* | FMNH | 165849 |
| *Bothrocophias_hyoprora* | FMNH | 56171 |
| *Bothrocophias_hyoprora* | USNM | S/N |
| *Bothrocophias_hyoprora* | AMNH | 54601 |
| *Bothrocophias_hyoprora* | AMNH | 53369 |
| *Bothrocophias_hyoprora* | AMNH | 52808 |
| *Bothrocophias_hyoprora* | AMNH | 52265 |
| *Bothrocophias_hyoprora* | AMNH | 52098 |
| *Bothrocophias_hyoprora* | AMNH | 113642 |
| *Bothrocophias_microphthalmus* | BMNH | 58.7.25.13 |
| *Bothrocophias_microphthalmus* | AMNH | 52470 |
| *Bothrops_alcatraz* | IBSP | 85710 |
| *Bothrops_alcatraz* | IBSP | 57105 |
| *Bothrops_alcatraz* | IBSP | 55791 |
| *Bothrops_alternatus* | MNRJ | 8608 |
| *Bothrops_alternatus* | MNRJ | 22192 |
| *Bothrops_alternatus* | MNRJ | 8602 |
| *Bothrops_alternatus* | MNRJ | 22094 |
| *Bothrops_alternatus* | MNRJ/AL | 5553 |
| *Bothrops_alternatus* | IBSP | 85656 |
| *Bothrops_alternatus* | IBSP | 85659 |
| *Bothrops_alternatus* | IBSP | 84796 |
| *Bothrops_alternatus* | IBSP | 84797 |
| *Bothrops_ammodytoides* | BMNH | 72.11.4.2 |
| *Bothrops_ammodytoides* | FMNH | 10832 |
| *Bothrops_ammodytoides* | USNM | 73421 |
| *Bothrops_ammodytoides* | AMNH | 110143 |
| *Bothrops_asper* | MNRJ | 8757 |
| *Bothrops_asper* | MNRJ | 8758 |
| *Bothrops_asper* | MNRJ | 8759 |
| *Bothrops_asper* | UTA | R50466 |
| *Bothrops_atrox* | MNRJ | 15003 |
| *Bothrops_atrox* | MNRJ | 16821 |
| *Bothrops_atrox* | MNRJ | 16825 |
| *Bothrops_atrox* | MNRJ | 230 |
| *Bothrops_atrox* | MNRJ | 8577 |
| *Bothrops_atrox* | MNRJ | 974 |
| *Bothrops_barnetti* | BMNH | 1946.1.18.81 |
| *Bothrops_barnetti* | BMNH | 1946.1.18.71 |
| *Bothrops_barnetti* | FMNH | 9787 |
| *Bothrops_barnetti* | FMNH | 41603 |
| *Bothrops_bilineata* | MNRJ | 3434 |
| *Bothrops_bilineata* | MNRJ | 3424 |
| *Bothrops_bilineata* | MNRJ | 3044 |
| *Bothrops_brazili* | USNM | 316671 |
| *Bothrops_brazili* | USNM | 345184 |
| *Bothrops_caribbaeus* | UTA | R16311 |
| *Bothrops_caribbaeus* | USNM | 15082 |
| *Bothrops_caribbaeus* | AMNH | 134681 |
| *Bothrops_caribbaeus* | AMNH | 134683 |
| *Bothrops_chloromelas* | AMNH | 104298 |
| *Bothrops_cotiara* | MNRJ | 10078 |
| *Bothrops_cotiara* | MNRJ/AL | 5401A |
| *Bothrops_cotiara* | IBSP | 1100 |
| *Bothrops_cotiara* | IBSP | 811 |
| *Bothrops_cotiara* | IBSP | 1143 |
| *Bothrops_cotiara* | IBSP | 1031 |
| *Bothrops_cotiara* | IBSP | 1034 |
| *Bothrops_diporus* | IBSP | 84180 |
| *Bothrops_erythromelas* | MNRJ | 3068 |
| *Bothrops_erythromelas* | MNRJ | 7528 |
| *Bothrops_erythromelas* | MNRJ | 3067 |
| *Bothrops_erythromelas* | MNRJ | 7527 |
| *Bothrops_erythromelas* | MNRJ | 16925 |
| *Bothrops_erythromelas* | MNRJ | 9074 |
| *Bothrops_lutzi* | IBSP | 552 |
| *Bothrops_lutzi* | IBSP | 563 |
| *Bothrops_fonsecai* | MNRJ | 19280 |
| *Bothrops_fonsecai* | MNRJ | 8601 |
| *Bothrops_fonsecai* | MNRJ | 19280 |
| *Bothrops_fonsecai* | MNRJ | 8333 |
| *Bothrops_fonsecai* | IBSP | 31019 |
| *Bothrops_fonsecai* | IBSP | 53962 |
| *Bothrops_insularis* | IBSP | 18491 |
| *Bothrops_insularis* | IBSP | 1969 |
| *Bothrops_insularis* | IBSP | 1882 |
| *Bothrops_insularis* | IBSP | 1965 |
| *Bothrops_insularis* | IBSP | 1972 |
| *Bothrops_insularis* | IBSP | 1960 |
| *Bothrops_insularis* | IBSP | 1951 |
| *Bothrops_insularis* | IBSP | 18484 |
| *Bothrops_leucurus* | MNRJ | 22731 |
| *Bothrops_leucurus* | MNRJ | 3943 |
| *Bothrops_leucurus* | MNRJ | 9801 |
| *Bothrops_leucurus* | MNRJ | 2516 |
| *Bothrops_leucurus* | IBSP | 20666 |
| *Bothrops_leucurus* | IBSP | 50505 |
| *Bothrops_leucurus* | IBSP | 20663 |
| *Bothrops_leucurus* | IBSP | 20659 |
| *Bothrops_itapetiningae* | MNRJ | 19345 |
| *Bothrops_itapetiningae* | IBSP | S/N |
| *Bothrops_moojeni* | MNRJ | 5396 |
| *Bothrops_moojeni* | MNRJ | 7169 |
| *Bothrops_moojeni* | MNRJ | 7120 |
| *Bothrops_moojeni* | MNRJ | 15302 |
| *Bothrops_moojeni* | MNRJ | 7113 |
| *Bothrops_moojeni* | MNRJ | 14029 |
| *Bothrops_moojeni* | MNRJ | 9020 |
| *Bothrops_moojeni* | MNRJ | 8226 |
| *Bothrops_moojeni* | MNRJ | 21876 |
| *Bothrops_moojeni* | MNRJ | 14994 |
| *Bothrops_moojeni* | MNRJ | 7109 |
| *Bothrops_moojeni* | MNRJ | 7122 |
| *Bothrops_moojeni* | MNRJ | 5396 |
| *Bothrops_moojeni* | MNRJ | 10046 |
| *Bothrops_moojeni* | MNRJ | 7499 |
| *Bothrops_moojeni* | MNRJ | 20280 |
| *Bothrops_moojeni* | MNRJ | 7118 |
| *Bothrops_moojeni* | IBSP | 44905 |
| *Bothrops_moojeni* | IBSP | 20249 |
| *Bothrops_moojeni* | IBSP | 44920 |
| *Bothrops_jararacussu* | MZUSP | 3100 |
| *Bothrops_jararacussu* | MNRJ | 17830 |
| *Bothrops_jararacussu* | MNRJ | 21859 |
| *Bothrops_jararacussu* | MNRJ | 20918 |
| *Bothrops_jararacussu* | MNRJ | 14041 |
| *Bothrops_jararacussu* | IBSP | 11559 |
| *Bothrops_jararaca* | MZUSP | 4496 |
| *Bothrops_jararaca* | MZUSP | 2255 |
| *Bothrops_jararaca* | MZUSP | 9479 |
| *Bothrops_jararaca* | MZUSP | 9436 |
| *Bothrops_jararaca* | MZUSP | 8064 |
| *Bothrops_jararaca* | MZUSP | 7572 |
| *Bothrops_jararaca* | MNRJ | 13108 |
| *Bothrops_jararaca* | MNRJ | 20347 |
| *Bothrops_jararaca* | MNRJ | 21094 |
| *Bothrops_jararaca* | MNRJ | 12754 |
| *Bothrops_jararaca* | MNRJ | 10260 |
| *Bothrops_jararaca* | MNRJ | 10592 |
| *Bothrops_jararaca* | MNRJ | 7929 |
| *Bothrops_jararaca* | MNRJ | 932 |
| *Bothrops_jararaca* | MNRJ | 18921 |
| *Bothrops_jararaca* | MNRJ | 17834 |
| *Bothrops_jararaca* | MNRJ | 10077 |
| *Bothrops_jararaca* | MNRJ | 20347 |
| *Bothrops_jararaca* | MNRJ | 7900 |
| *Bothrops_jararaca* | MNRJ | 19948 |
| *Bothrops_jararaca* | IBSP | 82274 |
| *Bothrops_jararaca* | IBSP | 77469 |
| *Bothrops_jararaca* | IBSP | 85415 |
| *Bothrops_jararaca* | IBSP | 85414 |
| *Bothrops_jararaca* | IBSP | 85418 |
| *Bothrops_jararaca* | IBSP | 85417 |
| *Bothrops_pauloensis* | MNRJ | 22694 |
| *Bothrops_pauloensis* | MNRJ | 22697 |
| *Bothrops_pauloensis* | MNRJ | 18557 |
| *Bothrops_pauloensis* | IBSP | 63402 |
| *Bothrops_neuwiedi* | MNRJ | 20696 |
| *Bothrops_neuwiedi* | MNRJ | 19957 |
| *Bothrops_neuwiedi* | MNRJ | 19958 |
| *Bothrops_neuwiedi* | MNRJ | 18955 |
| *Bothrops_neuwiedi* | MNRJ | 16950 |
| *Bothrops_neuwiedi* | MNRJ | 17860 |
| *Bothrops_neuwiedi* | MNRJ | 19398 |
| *Bothrops_neuwiedi* | IBSP | 7990 |
| *Bothrops_lanceolatus* | MNHParis | 1988.104 |
| *Bothrops_lanceolatus* | MNHParis | 1988.108 |
| *Bothrops_lanceolatus* | MNHParis | 1988.110 |
| *Bothrops_lanceolatus* | MNHParis | 1988.106 |
| *Bothrops_lojanus* | BMNH | 1930.10.12.26-27 |
| *Bothrops_lojanus* | BMNH | 1930.10.12.26-27 |
| *Bothrops_lojanus* | BMNH | 1931.11.3.12-14 |
| *Bothrops_lojanus* | BMNH | 1935.11.3.115-119 |
| *Bothrops_lojanus* | USNM | 98935 |
| *Bothrops_marmoratus* | IBSP | 57153 |
| *Bothrops_marmoratus* | IBSP | 57155 |
| *Bothrops_matogrossensis* | MNRJ | 20961 |
| *Bothrops_matogrossensis* | MNRJ | 20963 |
| *Bothrops_matogrossensis* | MNRJ | 20960 |
| *Bothrops_matogrossensis* | MNRJ | 8227 |
| *Bothrops_pictus* | BMNH | 19.11.12.20.12 |
| *Bothrops_pictus* | MNHParis | 6410 |
| *Bothrops_pictus* | MNHParis | 1543 |
| *Bothrops_pictus* | FMNH | 5662 |
| *Bothrops_pubescens* | MNRJ | 12138 |
| *Bothrops_pubescens* | MNRJ | 10079 |
| *Bothrops_pulchra* | BMNH | 78.1.25.54 |
| *Bothrops_punctatus* | BMNH | 1914.5.21.71 |
| *Bothrops_punctatus* | AMNH | 107914 |
| *Bothrops_taeniata* | MNRJ | 10836 |
| *Calloselasma_rhodostoma* | MNHParis | 1988.69 |
| *Calloselasma_rhodostoma* | MNHParis | 1988.70 |
| *Calloselasma_rhodostoma* | MNHParis | 1990.3824 |
| *Causus_defilippii* | BMNH | 1975.1120 |
| *Causus_defilippii* | BMNH | 1952.1.10.81 |
| *Causus_defilippii* | BMNH | 1952.1.10.85 |
| *Causus_defilippii* | BMNH | 1952.1.10.86 |
| *Causus_defilippii* | BMNH | 93.10.26.71-72 |
| *Causus_defilippii* | BMNH | 1983.1089 |
| *Causus_defilippii* | BMNH | 95.2.26.3 |
| *Causus_defilippii* | MNHParis | 1896.596 |
| *Causus_defilippii* | MNHParis | 1896.595 |
| *Causus_lichtensteini* | BMNH | 1919.8.16.99 |
| *Causus_lichtensteini* | BMNH | 1950.1.2.11-12 |
| *Causus_lichtensteini* | BMNH | 1950.1.2.11-12 |
| *Causus_lichtensteini* | BMNH | 1934.12.1.34 |
| *Causus_lichtensteini* | BMNH | 1907.5.22.63-5 |
| *Causus_lichtensteini* | BMNH | 1907.5.22.63-5 |
| *Causus_lichtensteini* | MNHParis | 1973.1245 |
| *Causus_resimus* | BMNH | 1924.2.19.7 |
| *Causus_resimus* | BMNH | 1907.12.2.29 |
| *Causus_resimus* | BMNH | 1912.10.14.7 |
| *Causus_resimus* | BMNH | 1924.5.21.23 |
| *Causus_resimus* | BMNH | 1911.7.8.19 |
| *Causus_resimus* | MNHParis | 1989.39 |
| *Causus_resimus* | MNHParis | 1904.204 |
| *Causus_resimus* | MNHParis | 1988.2115 |
| *Causus_rhombeatus* | BMNH | 48.3.13.3-4 |
| *Causus_rhombeatus* | BMNH | 1929.4.14.16-18 |
| *Causus_rhombeatus* | BMNH | 1954.1.12.54 |
| *Causus_rhombeatus* | BMNH | 95.5.3.53-5 |
| *Causus_rhombeatus* | BMNH | 58.4.11.4 |
| *Causus_rhombeatus* | MNHParis | 1912.382 |
| *Causus_rhombeatus* | MNHParis | 1921.491 |
| *Cerastes_cerastes* | BMNH | 1970.1760 |
| *Cerastes_cerastes* | BMNH | 1912.11.30.130-138 |
| *Cerastes_cerastes* | BMNH | 97.10.26.633 |
| *Cerastes_cerastes* | MNHParis | 4022 |
| *Cerastes_cerastes* | AMNH | 116016 |
| *Cerastes_gasperettii* | BMNH | 1986.351 |
| *Cerastes_gasperettii* | BMNH | 1985.654 |
| *Cerastes_gasperettii* | BMNH | 1994.133 |
| *Cerastes_gasperettii* | USNM | 129454 |
| *Cerastes_gasperettii* | USNM | 129881 |
| *Cerastes_vipera* | BMNH | 1912.11.9.135 |
| *Cerastes_vipera* | BMNH | 1987.2362 |
| *Cerastes_vipera* | MNHParis | 4014 |
| *Cerastes_vipera* | CAS | 138623 |
| *Cerastes_vipera* | FMNH | 81217 |
| *Cerastes_vipera* | FMNH | 22927 |
| *Mixcoatlus_barbouri* | UTA | R15558 |
| *Mixcoatlus_barbouri* | UTA | R4450 |
| *Mixcoatlus_barbouri* | FMNH | 38503 |
| *Cerrophidion_godmani* | UTA | R37293 |
| *Cerrophidion_godmani* | UTA | R7143 |
| *Cerrophidion_godmani* | UTA | R42230 |
| *Cerrophidion_godmani* | UTA | R38272 |
| *Cerrophidion_godmani* | UTA | R24765 |
| *Cerrophidion_godmani* | USNM | 319985 |
| *Cerrophidion_sasai* | UTA | R51399 |
| *Cerrophidion_sasai* | UTA | R51403 |
| *Cerrophidion_sasai* | UTA | R51402 |
| *Cerrophidion_tzotzilorum* | UTA | R9641 |
| *Cerrophidion_tzotzilorum* | AMNH | 103133 |
| *Crotalus_adamanteus* | USNM | 250 |
| *Crotalus_adamanteus* | USNM | 104562 |
| *Crotalus_adamanteus* | AMNH | 81997 |
| *Crotalus_adamanteus* | AMNH | 63830 |
| *Crotalus_adamanteus* | AMNH | 160660 |
| *Crotalus_adamanteus* | AMNH | 815537 |
| *Crotalus_aquilus* | UTA | R12595 |
| *Crotalus_aquilus* | UTA | R22525 |
| *Crotalus_aquilus* | UTA | R17904 |
| *Crotalus_aquilus* | UTA | R6180 |
| *Crotalus_aquilus* | UTA | R18341 |
| *Crotalus_aquilus* | UTA | R25407 |
| *Crotalus_aquilus* | AMNH | 64604 |
| *Crotalus_atrox* | CAS | 65086 |
| *Crotalus_atrox* | CAS | 65085 |
| *Crotalus_atrox* | CAS | 33656 |
| *Crotalus_atrox* | CAS | 63879 |
| *Crotalus_atrox* | CAS | 14366 |
| *Crotalus_atrox* | CAS | 65698 |
| *Crotalus_basiliscus* | CAS | 159399 |
| *Crotalus_basiliscus* | CAS | 24095 |
| *Crotalus_basiliscus* | CAS | 74403 |
| *Crotalus_basiliscus* | AMNH | 64254 |
| *Crotalus_basiliscus* | AMNH | 31886 |
| *Crotalus_catalinensis* | UTA | R32129 |
| *Crotalus_cerastes* | CAS | 183159 |
| *Crotalus_cerastes* | CAS | 192596 |
| *Crotalus_cerastes* | CAS | 223518 |
| *Crotalus_cerastes* | CAS | 182489 |
| *Crotalus_cerastes* | CAS | 182478 |
| *Crotalus_cerastes* | CAS | 101442 |
| *Crotalus_cerastes* | CAS | 12779 |
| *Crotalus_cerastes* | USNM | 205522 |
| *Crotalus_cerberus* | CAS | 17539 |
| *Crotalus_cerberus* | FMNH | 51766 |
| *Crotalus_cerberus* | FMNH | 18423 |
| *Crotalus_culminatus* | UTA | R41028 |
| *Crotalus_culminatus* | CAS | 71761 |
| *Crotalus_culminatus* | FMNH | 38500 |
| *Crotalus_durissus* | MNRJ | 7133 |
| *Crotalus_durissus* | MNRJ | 1362 |
| *Crotalus_durissus* | MNRJ | 8597 |
| *Crotalus_durissus* | MNRJ | 22949 |
| *Crotalus_durissus* | MNRJ | 8753 |
| *Crotalus_durissus* | MNRJ | 15353 |
| *Crotalus_durissus* | MNRJ | 14995 |
| *Crotalus_durissus* | MNRJ | 21744 |
| *Crotalus_durissus* | MNRJ | 14996 |
| *Crotalus_durissus* | MNRJ | 21850 |
| *Crotalus_durissus* | MNRJ | 21873 |
| *Crotalus_durissus* | IBSP | 83928 |
| *Crotalus_durissus* | UTA | R21912 |
| *Crotalus_durissus* | UTA | R12673 |
| *Crotalus_enyo* | UTA | R8082 |
| *Crotalus_enyo* | UTA | R7470 |
| *Crotalus_enyo* | UTA | R7500 |
| *Crotalus_enyo* | CAS | 143853 |
| *Crotalus_enyo* | CAS | 14022 |
| *Crotalus_enyo* | CAS | 103469 |
| *Crotalus_enyo* | CAS | 90317 |
| *Crotalus_enyo* | CAS | 143987 |
| *Crotalus_ericsmithi* | UTA | R55372 |
| *Crotalus_horridus* | AMNH | 46392 |
| *Crotalus_horridus* | AMNH | 128165 |
| *Crotalus_horridus* | AMNH | 129137 |
| *Crotalus_horridus* | AMNH | 4082 |
| *Crotalus_horridus* | AMNH | 129420 |
| *Crotalus_horridus* | AMNH | 146519 |
| *Crotalus_intermedius* | UTA | R6232 |
| *Crotalus_intermedius* | UTA | R4539 |
| *Crotalus_intermedius* | UTA | R4538 |
| *Crotalus_intermedius* | UTA | R9354 |
| *Crotalus_intermedius* | CAS | 93777 |
| *Crotalus_intermedius* | AMNH | 102477 |
| *Crotalus_intermedius* | AMNH | 102909 |
| *Crotalus_intermedius* | AMNH | 90799 |
| *Crotalus_intermedius* | AMNH | 72476 |
| *Crotalus_lepidus* | UTA | R8343 |
| *Crotalus_lepidus* | UTA | R8331 |
| *Crotalus_lepidus* | UTA | R17836 |
| *Crotalus_lepidus* | UTA | R32144 |
| *Crotalus_lepidus* | UTA | R16285 |
| *Crotalus_lepidus* | UTA | R7434 |
| *Crotalus_lepidus* | AMNH | 138254 |
| *Crotalus_mitchellii* | CAS | 52842 |
| *Crotalus_mitchellii* | CAS | 103470 |
| *Crotalus_mitchellii* | CAS | 182495 |
| *Crotalus_mitchellii* | CAS | 40092 |
| *Crotalus_mitchellii* | CAS | 85698 |
| *Crotalus_mitchellii* | CAS | 45887 |
| *Crotalus_molossus* | CAS | 48048 |
| *Crotalus_molossus* | CAS | 48047 |
| *Crotalus_molossus* | CAS | 48042 |
| *Crotalus_molossus* | AMNH | 67305 |
| *Crotalus_molossus* | AMNH | 26025 |
| *Crotalus_molossus* | AMNH | 138246 |
| *Crotalus_oreganus* | CAS | 238534 |
| *Crotalus_oreganus* | CAS | 223732 |
| *Crotalus_oreganus* | CAS | 209200 |
| *Crotalus_oreganus* | USNM | 209457 |
| *Crotalus_oreganus* | AMNH | 66076 |
| *Crotalus_ornatus* | USNM | 103738 |
| *Crotalus_polystictus* | MNHParis | 1975.145 |
| *Crotalus_polystictus* | MNHParis | 5092 |
| *Crotalus_polystictus* | MNHParis | 1888.284 |
| *Crotalus_polystictus* | UTA | R4499 |
| *Crotalus_polystictus* | UTA | R6927 |
| *Crotalus_polystictus* | AMNH | 161898 |
| *Crotalus_polystictus* | AMNH | 19861 |
| *Crotalus_polystictus* | AMNH | 19858 |
| *Crotalus_pricei* | UTA | R6251 |
| *Crotalus_pricei* | UTA | R45019 |
| *Crotalus_pricei* | UTA | R57636 |
| *Crotalus_pricei* | CAS | 169788 |
| *Crotalus_pricei* | CAS | 48037 |
| *Crotalus_pricei* | CAS | 121003 |
| *Crotalus_pricei* | CAS | 48036 |
| *Crotalus_pricei* | CAS | 48034 |
| *Crotalus_pusillus* | UTA | R4530 |
| *Crotalus_pusillus* | UTA | R9358 |
| *Crotalus_pusillus* | UTA | R6119 |
| *Crotalus_pusillus* | FMNH | 37048 |
| *Crotalus_pusillus* | FMNH | 39120 |
| *Crotalus_pusillus* | FMNH | 39113 |
| *Crotalus_pusillus* | FMNH | 39112 |
| *Crotalus_ravus* | UTA | R12610 |
| *Crotalus_ravus* | UTA | R12607 |
| *Crotalus_ravus* | UTA | R12608 |
| *Crotalus_ravus* | UTA | R12625 |
| *Crotalus_ravus* | UTA | R25859 |
| *Crotalus_ravus* | UTA | R13633 |
| *Crotalus_ruber* | CAS | 223537 |
| *Crotalus_ruber* | CAS | 169526 |
| *Crotalus_ruber* | CAS | 195596 |
| *Crotalus_ruber* | CAS | 103467 |
| *Crotalus_ruber* | CAS | 53717 |
| *Crotalus_ruber* | CAS | 51258 |
| *Crotalus_ruber* | CAS | 146940 |
| *Crotalus_ruber* | CAS | 104358 |
| *Crotalus_scutulatus* | AMNH | 69936 |
| *Crotalus_scutulatus* | AMNH | 68345 |
| *Crotalus_scutulatus* | AMNH | 68321 |
| *Crotalus_scutulatus* | AMNH | 68958 |
| *Crotalus_scutulatus* | AMNH | 88819 |
| *Crotalus_simus* | UTA | R5252 |
| *Crotalus_simus* | UTA | R21911 |
| *Crotalus_simus* | UTA | R33133 |
| *Crotalus_simus* | UTA | R52497 |
| *Crotalus_simus* | UTA | R7701 |
| *Crotalus_stejnegeri* | UTA | R6234 |
| *Crotalus_tancitarensis* | UTA | R52401 |
| *Crotalus_tancitarensis* | FMNH | 39115 |
| *Crotalus_tigris* | UTA | R31060 |
| *Crotalus_tigris* | UTA | R32248 |
| *Crotalus_tigris* | CAS | 92265 |
| *Crotalus_tigris* | CAS | 92266 |
| *Crotalus_tigris* | CAS | 192769 |
| *Crotalus_tigris* | CAS | 102913 |
| *Crotalus_tigris* | USNM | 156808 |
| *Crotalus_tigris* | AMNH | 64273 |
| *Crotalus_tigris* | AMNH | 26024 |
| *Crotalus_tigris* | AMNH | 02537 |
| *Crotalus_tortugensis* | FMNH | 18426 |
| *Crotalus_totonacus* | UTA | R7222 |
| *Crotalus_totonacus* | UTA | R7224 |
| *Crotalus_totonacus* | USNM | 209856 |
| *Crotalus_transversus* | UTA | R3988 |
| *Crotalus_triseriatus* | MNHParis | 1898.254 |
| *Crotalus_triseriatus* | MNHParis | 1641 |
| *Crotalus_triseriatus* | UTA | R14516 |
| *Crotalus_triseriatus* | UTA | R12601 |
| *Crotalus_triseriatus* | UTA | R59041 |
| *Crotalus_triseriatus* | UTA | R32788 |
| *Crotalus_triseriatus* | FMNH | 39110 |
| *Crotalus_triseriatus* | AMNH | 106588 |
| *Crotalus_tzcaban* | UTA | R6802 |
| *Crotalus_tzcaban* | UTA | R6732 |
| *Crotalus_tzcaban* | USNM | 46400 |
| *Crotalus_viridis* | CAS | 10419 |
| *Crotalus_viridis* | CAS | 93802 |
| *Crotalus_viridis* | CAS | 93803 |
| *Crotalus_viridis* | USNM | 313396 |
| *Crotalus_viridis* | AMNH | 121442 |
| *Crotalus_willardi* | UTA | R9356 |
| *Crotalus_willardi* | UTA | R17849 |
| *Crotalus_willardi* | UTA | R32081 |
| *Crotalus_willardi* | UTA | R22526 |
| *Crotalus_willardi* | UTA | R6942 |
| *Crotalus_willardi* | UTA | R17855 |
| *Crotalus_willardi* | UTA | R21922 |
| *Crotalus_willardi* | UTA | R18229 |
| *Daboia_deserti* | MNHParis | 1988.27 |
| *Daboia_deserti* | MNHParis | 1988.2497 |
| *Daboia_deserti* | MNHParis | 1988.4000 |
| *Daboia_deserti* | MNHParis | 1990.4197 |
| *Daboia_deserti* | UTA | R8226 |
| *Daboia_mauritanica* | BMNH | 1906.10.31.11 |
| *Daboia_mauritanica* | BMNH | 1906.10.31.13 |
| *Daboia_mauritanica* | MNHParis | 1989.99 |
| *Daboia_mauritanica* | MNHParis | 1961.327 |
| *Daboia_palaestinae* | BMNH | 1937.9.4.1 |
| *Daboia_palaestinae* | BMNH | 1984.1220 |
| *Daboia_palaestinae* | MNHParis | 1989.70 |
| *Daboia_palaestinae* | MNHParis | 1986.123A |
| *Daboia_palaestinae* | MNHParis | 1986.123B |
| *Daboia_russelii* | MNHParis | 1962.259 |
| *Daboia_russelii* | MNHParis | 1962.258 |
| *Daboia_russelii* | MNHParis | 3187A |
| *Daboia_russelii* | AMNH | 84442 |
| *Daboia_russelii* | AMNH | 161845 |
| *Daboia_siamensis* | BMNH | 1929.10.10.1-2 |
| *Daboia_siamensis* | BMNH | 1987.456 |
| *Daboia_siamensis* | BMNH | 1987.454 |
| *Daboia_siamensis* | BMNH | 1987.451 |
| *Daboia_siamensis* | MNHParis | 4020 |
| *Deinagkistrodon_acutus* | MNHParis | 1993.3464 |
| *Deinagkistrodon_acutus* | MNHParis | 1969.8 |
| *Deinagkistrodon_acutus* | UTA | R32133 |
| *Deinagkistrodon_acutus* | UTA | R8190 |
| *Deinagkistrodon_acutus* | CAS | 18765 |
| *Deinagkistrodon_acutus* | CAS | 121007 |
| *Deinagkistrodon_acutus* | FMNH | 127212 |
| *Deinagkistrodon_acutus* | AMNH | 83994 |
| *Echis_carinatus* | BMNH | 1983.716 |
| *Echis_carinatus* | BMNH | 1903.3.6.54 |
| *Echis_carinatus* | BMNH | 1964.259 |
| *Echis_carinatus* | MNHParis | 1988.3993 |
| *Echis_carinatus* | AMNH | 88472 |
| *Echis_coloratus* | BMNH | 1986.451 |
| *Echis_coloratus* | BMNH | 1986.456 |
| *Echis_coloratus* | BMNH | 1985.732 |
| *Echis_coloratus* | MNHParis | 1988.97 |
| *Echis_coloratus* | MNHParis | 1997.3446 |
| *Echis_coloratus* | MNHParis | 1990.4194 |
| *Echis_coloratus* | MNHParis | 1990.4192 |
| *Echis_coloratus* | CAS | 139767 |
| *Echis_jogeri* | MNHParis | 1993.0144 |
| *Echis_khosatzkii* | BMNH | 97.3.11.117 |
| *Echis_leucogaster* | BMNH | 1961.1849 |
| *Echis_leucogaster* | BMNH | 1961.1850 |
| *Echis_leucogaster* | BMNH | 1906.5.7.8 |
| *Echis_leucogaster* | MNHParis | 2002.0779 |
| *Echis_leucogaster* | MNHParis | 1985.454 |
| *Echis_leucogaster* | CAS | 136088 |
| *Echis_leucogaster* | USNM | 161948 |
| *Echis_ocellatus* | BMNH | 1976.688 |
| *Echis_ocellatus* | BMNH | 1976.725 |
| *Echis_ocellatus* | BMNH | 1975.704 |
| *Echis_ocellatus* | BMNH | 1975.706 |
| *Echis_ocellatus* | MNHParis | 1977.602 |
| *Echis_ocellatus* | MNHParis | 1977.596 |
| *Echis_ocellatus* | MNHParis | 1977.603 |
| *Echis_omanensis* | BMNH | 1977.84 |
| *Echis_omanensis* | BMNH | 1972.712 |
| *Echis_omanensis* | BMNH | 1971.127 |
| *Echis_omanensis* | BMNH | 1978.353 |
| *Echis_omanensis* | CAS | 250912 |
| *Echis_pyramidum* | BMNH | 1954.1.15.53-54 |
| *Echis_pyramidum* | BMNH | 1938.8.4.85-87 |
| *Echis_pyramidum* | BMNH | 51.7.17.157 |
| *Echis_pyramidum* | BMNH | 11.1.3a |
| *Echis_pyramidum* | MNHParis | 1981.482 |
| *Echis_pyramidum* | MNHParis | 1990.4203 |
| *Eristicophis_macmahoni* | BMNH | S/N |
| *Eristicophis_macmahoni* | UTA | R16392 |
| *Eristicophis_macmahoni* | UTA | R16391 |
| *Eristicophis_macmahoni* | UTA | R15665 |
| *Eristicophis_macmahoni* | UTA | R16390 |
| *Garthius_chaseni* | FMNH | 71860 |
| *Gloydius_blomhoffi* | BMNH | 1870.1.14.2 |
| *Gloydius_blomhoffi* | BMNH | 1980.6.25.10 |
| *Gloydius_blomhoffi* | BMNH | 1893.4.20.28 |
| *Gloydius_blomhoffi* | MNHParis | 1999.7969 |
| *Gloydius_blomhoffi* | MNHParis | 1999.7970 |
| *Gloydius_blomhoffi* | MNHParis | 1888.37 |
| *Gloydius_blomhoffi* | MNHParis | 1888.36 |
| *Gloydius_blomhoffi* | CAS | 26732 |
| *Gloydius_brevicaudus* | MNHParis | 1902.74 |
| *Gloydius_brevicaudus* | MNHParis | 831 |
| *Gloydius_brevicaudus* | FMNH | 188988 |
| *Gloydius_brevicaudus* | FMNH | 188975 |
| *Gloydius_brevicaudus* | AMNH | 108495 |
| *Gloydius_brevicaudus* | AMNH | 108496 |
| *Gloydius_brevicaudus* | AMNH | 108498 |
| *Gloydius_halys* | MNHParis | 865 |
| *Gloydius_halys* | AMNH | 119011 |
| *Gloydius_halys* | AMNH | 123300 |
| *Gloydius_intermedius* | MNHParis | 1896.206 |
| *Gloydius_intermedius* | CAS | 121001 |
| *Gloydius_intermedius* | USNM | 203374 |
| *Gloydius_intermedius* | USNM | 203380 |
| *Gloydius_saxatilis* | CAS | 31540 |
| *Gloydius_saxatilis* | CAS | 31543 |
| *Gloydius_saxatilis* | CAS | 31528 |
| *Gloydius_saxatilis* | AMNH | 108502 |
| *Gloydius_saxatilis* | AMNH | 108505 |
| *Gloydius_strauchi* | FMNH | 15171 |
| *Gloydius_strauchi* | FMNH | 15134 |
| *Gloydius_strauchi* | USNM | 81980 |
| *Gloydius_strauchi* | AMNH | 58080 |
| *Gloydius_ussuriensis* | CAS | 14586 |
| *Gloydius_ussuriensis* | FMNH | 188999 |
| *Gloydius_ussuriensis* | FMNH | S/N |
| *Gloydius_ussuriensis* | FMNH | 11480 |
| *Gloydius_ussuriensis* | FMNH | 11481 |
| *Hypnale_hypnale* | BMNH | 1931.5.13.98 |
| *Hypnale_hypnale* | CAS | 17270 |
| *Hypnale_hypnale* | AMNH | 102462 |
| *Hypnale_hypnale* | AMNH | 99384 |
| *Hypnale_hypnale* | AMNH | 132250 |
| *Hypnale_nepa* | BMNH | 1931.5.13.100 |
| *Hypnale_nepa* | BMNH | 1937.8.1.1 |
| *Hypnale_nepa* | BMNH | 1894.9.11.39 |
| *Hypnale_zara* | BMNH | 1946.1.19.96 |
| *Lachesis_acrochorda* | UTA | R56349 |
| *Lachesis_acrochorda* | UTA | R7418 |
| *Lachesis_melanocephala* | UTA | R7417 |
| *Lachesis_melanocephala* | UTA | R10347 |
| *Lachesis_muta* | MNRJ | 13256 |
| *Lachesis_muta* | MNRJ | 3039 |
| *Lachesis_muta* | MNRJ | 241 |
| *Lachesis_muta* | MNRJ | 18048 |
| *Lachesis_muta* | UTA | 25601 |
| *Lachesis_muta* | UTA | R25600 |
| *Lachesis_muta* | MNRJ | 3544 |
| *Lachesis_muta* | MNRJ | 4760 |
| *Lachesis_muta* | MNRJ | 8028 |
| *Lachesis_stenophrys* | UTA | R9323 |
| *Lachesis_stenophrys* | UTA | R25597 |
| *Lachesis_stenophrys* | UTA | R18211 |
| *Lachesis_stenophrys* | USNM | 165008 |
| *Lachesis_stenophrys* | AMNH | 172358 |
| *Macrovipera_lebetina* | BMNH | 1900.1.19.3 |
| *Macrovipera_lebetina* | BMNH | 79.8.15.34 |
| *Macrovipera_lebetina* | MNHParis | 1229 |
| *Macrovipera_lebetina* | MNHParis | 7737 |
| *Macrovipera_lebetina* | CAS | 218070 |
| *Macrovipera_lebetina* | CAS | 179736 |
| *Macrovipera_schweizeri* | BMNH | 1936.1.4.2-6 |
| *Macrovipera_schweizeri* | BMNH | 1936.1.4.2-7 |
| *Mixcoatlus_browni* | CAS | 135274 |
| *Montivipera_bornmuelleri* | BMNH | 1957.1.13.80 |
| *Montivipera_bornmuelleri* | BMNH | 1957.1.13.72 |
| *Montivipera_bornmuelleri* | BMNH | 1984.1227 |
| *Montivipera_latifii* | BMNH | 1976.555 |
| *Montivipera_latifii* | BMNH | 1976.554 |
| *Montivipera_latifii* | BMNH | 1976.552 |
| *Montivipera_latifii* | AMNH | 109617 |
| *Montivipera_raddei* | BMNH | 1976.556 |
| *Montivipera_raddei* | BMNH | 1976.557 |
| *Montivipera_raddei* | UTA | R7165 |
| *Montivipera_raddei* | CAS | 135746 |
| *Montivipera_wagneri* | MNHParis | 1988.9011 |
| *Montivipera_xanthina* | BMNH | 1984.1226 |
| *Montivipera_xanthina* | MNHParis | 1989.128 |
| *Montivipera_xanthina* | MNHParis | 1989.71 |
| *Montivipera_xanthina* | MNHParis | 1988.3867 |
| *Montivipera_xanthina* | MNHParis | 1988.22 |
| *Montivipera_xanthina* | MNHParis | 1988.26 |
| *Montivipera_xanthina* | CAS | 135748 |
| *Mixcoatlus_melanurus* | UTA | R6818 |
| *Mixcoatlus_melanurus* | UTA | R9610 |
| *Mixcoatlus_melanurus* | UTA | R6817 |
| *Mixcoatlus_melanurus* | UTA | R22451 |
| *Mixcoatlus_melanurus* | UTA | R16309 |
| *Mixcoatlus_melanurus* | UTA | R12559 |
| *Ophryacus_undulatus* | UTA | R4518 |
| *Ophryacus_undulatus* | UTA | R4642 |
| *Ophryacus_undulatus* | UTA | R4108 |
| *Ophryacus_undulatus* | UTA | R4640 |
| *Ophryacus_undulatus* | UTA | R25115 |
| *Ophryacus_undulatus* | UTA | R4835 |
| *Ophryacus_undulatus* | UTA | R4832 |
| *Ophryacus_undulatus* | UTA | R32426 |
| *Ophryacus_undulatus* | UTA | R4858 |
| *Ovophis_monticola* | BMNH | 1930.11.16.13 |
| *Ovophis_monticola* | BMNH | 1930.11.16.14 |
| *Ovophis_monticola* | MNHParis | 2011.02.49 |
| *Ovophis_monticola* | MNHParis | 1935.115 |
| *Ovophis_monticola* | FMNH | 232827 |
| *Ovophis_monticola* | FMNH | 258632 |
| *Ovophis_okinavensis* | BMNH | 1906.8.16.45 |
| *Ovophis_okinavensis* | MNHParis | 1986.103 |
| *Ovophis_okinavensis* | UTA | R22391 |
| *Ovophis_okinavensis* | UTA | R28192 |
| *Ovophis_okinavensis* | CAS | 21930 |
| *Ovophis_tonkinensis* | MNHParis | 1948.105 |
| *Ovophis_tonkinensis* | MNHParis | 2011.0246 |
| *Ovophis_zayuensis* | CAS | 233203 |
| *Porthidium_arcosae* | UTA | R55938 |
| *Porthidium_dunni* | UTA | R17905 |
| *Porthidium_dunni* | UTA | R4367 |
| *Porthidium_dunni* | FMNH | 104957 |
| *Porthidium_dunni* | AMNH | 91108 |
| *Porthidium_dunni* | AMNH | 19874 |
| *Porthidium_dunni* | AMNH | 66859 |
| *Porthidium_dunni* | AMNH | 66868 |
| *Porthidium_dunni* | AMNH | 66866 |
| *Porthidium_dunni* | AMNH | 66862 |
| *Porthidium_dunni* | AMNH | 66854 |
| *Porthidium_dunni* | AMNH | 66870 |
| *Porthidium_dunni* | AMNH | 66867 |
| *Porthidium_dunni* | AMNH | 65171 |
| *Porthidium_dunni* | AMNH | 65167 |
| *Porthidium_dunni* | AMNH | 65169 |
| *Porthidium_dunni* | AMNH | 65166 |
| *Porthidium_dunni* | AMNH | 68076 |
| *Porthidium_dunni* | AMNH | 65874 |
| *Porthidium_hespere* | UTA | R4443 |
| *Porthidium_lansbergii* | BMNH | 71.2.7.4 |
| *Porthidium_lansbergii* | BMNH | S/N |
| *Porthidium_lansbergii* | UTA | R3677 |
| *Porthidium_lansbergii* | CAS | 116159 |
| *Porthidium_lansbergii* | FMNH | 166032 |
| *Porthidium_lansbergii* | FMNH | 166080 |
| *Porthidium_lansbergii* | FMNH | 166097 |
| *Porthidium_lansbergii* | FMNH | 166073 |
| *Porthidium_nasutum* | UTA | R31057 |
| *Porthidium_nasutum* | UTA | R14181 |
| *Porthidium_nasutum* | UTA | R23065 |
| *Porthidium_nasutum* | UTA | R26408 |
| *Porthidium_nasutum* | UTA | R39207 |
| *Porthidium_ophryomegas* | UTA | R39755 |
| *Porthidium_ophryomegas* | UTA | R28565 |
| *Porthidium_ophryomegas* | UTA | R39217 |
| *Porthidium_ophryomegas* | UTA | R28563 |
| *Porthidium_ophryomegas* | UTA | R45885 |
| *Porthidium_ophryomegas* | UTA | R45887 |
| *Porthidium_ophryomegas* | UTA | R7722 |
| *Porthidium_ophryomegas* | AMNH | 161915 |
| *Porthidium_ophryomegas* | AMNH | 64407 |
| *Porthidium_porrasi* | UTA | R59119 |
| *Porthidium_porrasi* | UTA | R52898 |
| *Porthidium_porrasi* | UTA | R30830 |
| *Porthidium_yucatanicum* | UTA | R16960 |
| *Porthidium_yucatanicum* | FMNH | 36185 |
| *Porthidium_yucatanicum* | FMNH | 36176 |
| *Porthidium_yucatanicum* | FMNH | 36187 |
| *Porthidium_yucatanicum* | FMNH | 36182 |
| *Proatheris_superciliaris* | BMNH | 1934.4.6.36 |
| *Proatheris_superciliaris* | BMNH | 1929.11.2.7 |
| *Protobothrops_cornutus* | MNHParis | 1937.35 |
| *Protobothrops_elegans* | CAS | 21958 |
| *Protobothrops_elegans* | CAS | 21954 |
| *Protobothrops_elegans* | CAS | 21962 |
| *Protobothrops_elegans* | CAS | 21967 |
| *Protobothrops_elegans* | CAS | 21947 |
| *Protobothrops_elegans* | CAS | 21948 |
| *Protobothrops_flavoviridis* | BMNH | 87.10.5.1-2 |
| *Protobothrops_flavoviridis* | BMNH | 1906.8.16.35-36 |
| *Protobothrops_flavoviridis* | BMNH | 1906.8.16.35-36 |
| *Protobothrops_flavoviridis* | MNHParis | 1893.11 |
| *Protobothrops_flavoviridis* | MNHParis | 1895.142 |
| *Protobothrops_flavoviridis* | USNM | 121469 |
| *Protobothrops_jerdonii* | BMNH | 1974.910 |
| *Protobothrops_jerdonii* | BMNH | 91.6.13.1 |
| *Protobothrops_jerdonii* | BMNH | 1940.6.5.96 |
| *Protobothrops_jerdonii* | BMNH | 1940.6.5.95 |
| *Protobothrops_jerdonii* | BMNH | 1940.6.5.94 |
| *Protobothrops_jerdonii* | MNHParis | 1935.0114 |
| *Protobothrops_jerdonii* | MNHParis | 1938.0151 |
| *Protobothrops_kaulbacki* | BMNH | 1936.7.4.42 |
| *Protobothrops_kaulbacki* | BMNH | 1946.1.19.23 |
| *Protobothrops_kaulbacki* | BMNH | 1946.1.19.24 |
| *Protobothrops_kaulbacki* | CAS | 22430 |
| *Protobothrops_mucrosquamatus* | MNHParis | 1935.118 |
| *Protobothrops_mucrosquamatus* | MNHParis | 1897.100 |
| *Protobothrops_mucrosquamatus* | MNHParis | 1948.108 |
| *Protobothrops_mucrosquamatus* | CAS | 224365 |
| *Protobothrops_mucrosquamatus* | CAS | 238906 |
| *Protobothrops_mucrosquamatus* | CAS | 244954 |
| *Protobothrops_mucrosquamatus* | CAS | 18920 |
| *Protobothrops_mucrosquamatus* | CAS | 18923 |
| *Protobothrops_tokarensis* | MNHParis | 1988.2106 |
| *Protobothrops_tokarensis* | USNM | 348518 |
| *Pseudocerastes_persicus* | MNHParis | 1990.4.156 |
| *Pseudocerastes_persicus* | MNHParis | 1990.4.155 |
| *Pseudocerastes_persicus* | MNHParis | 1990.4.151 |
| *Pseudocerastes_persicus* | MNHParis | 1990.4.157 |
| *Pseudocerastes_urarachnoides* | FMNH | 170929 |
| *Pseudocerastes_fieldi* | UTA | R8178 |
| *Pseudocerastes_fieldi* | FMNH | 11061 |
| *Pseudocerastes_fieldi* | AMNH | 94418 |
| *Pseudocerastes_fieldi* | AMNH | 107688 |
| *Pseudocerastes_fieldi* | AMNH | 94419 |
| *Sistrurus_catenatus* | UTA | R6809 |
| *Sistrurus_catenatus* | UTA | R1335 |
| *Sistrurus_catenatus* | UTA | R11290 |
| *Sistrurus_catenatus* | UTA | R54126 |
| *Sistrurus_catenatus* | UTA | R53622 |
| *Sistrurus_catenatus* | UTA | R30852 |
| *Sistrurus_catenatus* | FMNH | 135026 |
| *Sistrurus_catenatus* | FMNH | 95447 |
| *Sistrurus_catenatus* | AMNH | 8700 |
| *Sistrurus_miliarius* | UTA | R25121 |
| *Sistrurus_miliarius* | UTA | R22378 |
| *Sistrurus_miliarius* | UTA | R56016 |
| *Sistrurus_miliarius* | USNM | 234410 |
| *Sistrurus_miliarius* | USNM | 234405 |
| *Sistrurus_miliarius* | USNM | 491 |
| *Trimeresurus_albolabris* | MNHParis | 1999.9474 |
| *Trimeresurus_albolabris* | UTA | ENS 14106 |
| *Trimeresurus_albolabris* | USNM | 163960 |
| *Trimeresurus_albolabris* | USNM | 163965 |
| *Trimeresurus_albolabris* | USNM | 72077 |
| *Trimeresurus_andersonii* | BMNH | 1937.3.1.23 |
| *Trimeresurus_andersonii* | BMNH | 1937.3.1.23 |
| *Trimeresurus_andersonii* | BMNH | 1940.3.9.37 |
| *Trimeresurus_barati* | BMNH | 1915.12.2.42 |
| *Trimeresurus_barati* | UTA | ENS 15785 |
| *Trimeresurus_borneensis* | BMNH | 94.8.37 |
| *Trimeresurus_borneensis* | BMNH | 94.6.30.67 |
| *Trimeresurus_buniana* | BMNH | 2005.1609 |
| *Trimeresurus_cantori* | BMNH | 1940.3.9.41 |
| *Trimeresurus_cantori* | BMNH | 1940.3.9.42 |
| *Trimeresurus_cantori* | BMNH | 1940.3.9.40 |
| *Trimeresurus_cantori* | USNM | 29445 |
| *Trimeresurus_erythrurus* | BMNH | 61.10.2.6 |
| *Trimeresurus_erythrurus* | UTA | R29684 |
| *Trimeresurus_erythrurus* | CAS | 243175 |
| *Trimeresurus_erythrurus* | CAS | 239502 |
| *Trimeresurus_erythrurus* | CAS | 240036 |
| *Trimeresurus_erythrurus* | AMNH | 63897 |
| *Trimeresurus_fasciatus* | MNHParis | 2000.401 |
| *Trimeresurus_flavomaculatus* | BMNH | 2002.18 |
| *Trimeresurus_flavomaculatus* | MNHParis | 1900.426 |
| *Trimeresurus_flavomaculatus* | FMNH | 270194 |
| *Trimeresurus_fucatus* | MNHParis | 1900.4283 |
| *Trimeresurus_fucatus* | MNHParis | 1900.4284 |
| *Trimeresurus_fucatus* | MNHParis | 1991.295 |
| *Trimeresurus_gramineus* | MNRJ | 13269 |
| *Trimeresurus_gramineus* | MNHParis | 4058 |
| *Trimeresurus_gramineus* | CAS | 14979 |
| *Trimeresurus_gramineus* | CAS | 18751 |
| *Trimeresurus_gramineus* | CAS | 18748 |
| *Trimeresurus_gramineus* | CAS | 18752 |
| *Trimeresurus_gramineus* | CAS | 18747 |
| *Trimeresurus_gumprechti* | BMNH | 2002.53 |
| *Trimeresurus_gumprechti* | MNHParis | 1987.3835 |
| *Trimeresurus_gumprechti* | MNHParis | 1999.9072 |
| *Trimeresurus_gumprechti* | CAS | 234873 |
| *Trimeresurus_hageni* | BMNH | 1988.859 |
| *Trimeresurus_hageni* | BMNH | 1988.861 |
| *Trimeresurus_hageni* | ZRC | 22932 |
| *Trimeresurus_hageni* | ZRC | 25397 |
| *Trimeresurus_hageni* | ZRC | 22935 |
| *Trimeresurus_hageni* | UTA | R55257 |
| *Trimeresurus_insularis* | MNHParis | 4057 |
| *Trimeresurus_insularis* | USNM | 579386 |
| *Trimeresurus_insularis* | USNM | 579784 |
| *Trimeresurus_insularis* | USNM | 573677 |
| *Trimeresurus_kanburiensis* | BMNH | 1992.535 |
| *Trimeresurus_macrops* | BMNH | 1988.876 |
| *Trimeresurus_macrops* | BMNH | 1988.1877 |
| *Trimeresurus_macrops* | BMNH | 1988.1057 |
| *Trimeresurus_macrops* | BMNH | 1988.1053 |
| *Trimeresurus_macrops* | BMNH | 1988.1052 |
| *Trimeresurus_macrops* | BMNH | 1988.865 |
| *Trimeresurus_macrops* | MNHParis | 1885.389 |
| *Trimeresurus_malabaricus* | BMNH | 74.4.29.136-139.1027 |
| *Trimeresurus_malabaricus* | MNHParis | 1913.5 |
| *Trimeresurus_malabaricus* | CAS | 17273 |
| *Trimeresurus_malabaricus* | FMNH | 217680 |
| *Trimeresurus_malabaricus* | FMNH | 30763 |
| *Trimeresurus_malcolmi* | BMNH | 1929.12.22.116 |
| *Trimeresurus_malcolmi* | FMNH | 239948 |
| *Trimeresurus_mcgregori* | BMNH | 2002.06 |
| *Trimeresurus_mcgregori* | BMNH | 2002.4 |
| *Trimeresurus_mcgregori* | BMNH | 2002.9 |
| *Trimeresurus_mcgregori* | BMNH | 2002.8 |
| *Trimeresurus_mcgregori* | MNHParis | 1900.427 |
| *Trimeresurus_nebularis* | BMNH | 2003.1 |
| *Trimeresurus_popeiorum* | BMNH | 1924.5.20.38 |
| *Trimeresurus_popeiorum* | BMNH | 60.3.19.1300B |
| *Trimeresurus_popeiorum* | BMNH | 72.4.17.137 |
| *Trimeresurus_popeiorum* | CAS | 240640 |
| *Trimeresurus_popeiorum* | FMNH | 178656 |
| *Trimeresurus_popeiorum* | FMNH | 265805 |
| *Trimeresurus_puniceus* | BMNH | 85.12.31.32-33 |
| *Trimeresurus_puniceus* | BMNH | 85.12.31.32-34 |
| *Trimeresurus_puniceus* | MNHParis | 1991.3286 |
| *Trimeresurus_puniceus* | FMNH | 183785 |
| *Trimeresurus_puniceus* | FMNH | 138662 |
| *Trimeresurus_puniceus* | FMNH | 131846 |
| *Trimeresurus_purpureomaculatus* | BMNH | 1988.397 |
| *Trimeresurus_purpureomaculatus* | MNHParis | 1990.4282 |
| *Trimeresurus_purpureomaculatus* | MNHParis | 1990.3880 |
| *Trimeresurus_purpureomaculatus* | MNHParis | 1999.6588 |
| *Trimeresurus_purpureomaculatus* | AMNH | 63899 |
| *Trimeresurus_purpureomaculatus* | AMNH | 63900 |
| *Trimeresurus_sabahi* | FMNH | 251048 |
| *Trimeresurus_sabahi* | USNM | 130253 |
| *Trimeresurus_schultzei* | FMNH | 53561 |
| *Trimeresurus_schultzei* | USNM | 37871 |
| *Trimeresurus_septentrionalis* | BMNH | 1950.1.5.64 |
| *Trimeresurus_septentrionalis* | BMNH | 1955.1.13.82 |
| *Trimeresurus_septentrionalis* | CAS | 135750 |
| *Trimeresurus_stejnegeri* | BMNH | 1953.1.2.88-92 |
| *Trimeresurus_stejnegeri* | BMNH | S/N |
| *Trimeresurus_stejnegeri* | BMNH | S/N |
| *Trimeresurus_stejnegeri* | BMNH | S/N |
| *Trimeresurus_stejnegeri* | MNHParis | 1912.353 |
| *Trimeresurus_stejnegeri* | MNHParis | 1912.352 |
| *Trimeresurus_stejnegeri* | MNHParis | 1912.354 |
| *Trimeresurus_stejnegeri* | MNHParis | 1999.9064 |
| *Trimeresurus_stejnegeri* | MNHParis | 1999.9055 |
| *Trimeresurus_sumatranus* | BMNH | 84.1.8.47 |
| *Trimeresurus_sumatranus* | USNM | 134125 |
| *Trimeresurus_tibetanus* | CAS | 177677 |
| *Trimeresurus_trigonocephalus* | MNHParis | 245 |
| *Trimeresurus_trigonocephalus* | UTA | R40461 |
| *Trimeresurus_trigonocephalus* | UTA | R8191 |
| *Trimeresurus_trigonocephalus* | UTA | R34536 |
| *Trimeresurus_trigonocephalus* | UTA | R32527 |
| *Trimeresurus_trigonocephalus* | USNM | 254789 |
| *Trimeresurus_venustus* | BMNH | 1988.384 |
| *Trimeresurus_vogeli* | FMNH | 180274 |
| *Trimeresurus_vogeli* | FMNH | 180273 |
| *Trimeresurus_vogeli* | FMNH | 180272 |
| *Trimeresurus_vogeli* | FMNH | 180260 |
| *Trimeresurus_vogeli* | FMNH | 180256 |
| *Trimeresurus_wiroti* | UTA | R38540 |
| *Trimeresurus_yunnanensis* | CAS | 215141 |
| *Trimeresurus_yunnanensis* | CAS | 234261 |
| *Trimeresurus_yunnanensis* | FMNH | 7065 |
| *Trimeresurus_yunnanensis* | AMNH | 62255 |
| *Tropidolaemus_subannulatus* | BMNH | 1946.1.19.33 |
| *Tropidolaemus_subannulatus* | MNHParis | 2011.02.52 |
| *Tropidolaemus_subannulatus* | MNHParis | 5821 |
| *Tropidolaemus_subannulatus* | MNHParis | 1891.0082 |
| *Tropidolaemus_subannulatus* | CAS | 8679 |
| *Tropidolaemus_subannulatus* | FMNH | 3566 |
| *Tropidolaemus_wagleri* | BMNH | 97.12.28.58 |
| *Tropidolaemus_wagleri* | BMNH | 1.2.9.0 |
| *Tropidolaemus_wagleri* | BMNH | 86.12.28.24 |
| *Vipera_ammodytes* | MNRJ | 21214 |
| *Vipera_ammodytes* | BMNH | 1931.12.15.3 |
| *Vipera_ammodytes* | BMNH | 1987.1848 |
| *Vipera_ammodytes* | BMNH | 1988.52 |
| *Vipera_ammodytes* | BMNH | 1920.1.2.2828 |
| *Vipera_ammodytes* | MNHParis | 7732 |
| *Vipera_ammodytes* | MNHParis | 1918.138 |
| *Vipera_ammodytes* | MNHParis | 1918.136 |
| *Vipera_ammodytes* | MNHParis | 1904- |
| *Vipera_ammodytes* | MNHParis | 1904.595 |
| *Vipera_ammodytes* | MNHParis | 1904.593 |
| *Vipera_aspis* | BMNH | 1920.1.20.250 |
| *Vipera_aspis* | BMNH | 90.5.17.17-18 |
| *Vipera_aspis* | BMNH | 809 |
| *Vipera_aspis* | MNHParis | 1905.411 |
| *Vipera_aspis* | MNHParis | 1905.453 |
| *Vipera_aspis* | MNHParis | 1905.452 |
| *Vipera_aspis* | MNHParis | 8485 |
| *Vipera_aspis* | MNHParis | 1939.25 |
| *Vipera_aspis* | MNHParis | 1922.296 |
| *Vipera_aspis* | MNHParis | 9861 |
| *Vipera_aspis* | MNHParis | 9858 |
| *Vipera_aspis* | MNHParis | 1993.1776 |
| *Vipera_berus* | MNRJ | 20774 |
| *Vipera_berus* | MNRJ | 237 |
| *Vipera_berus* | MNHParis | 1904.581 |
| *Vipera_berus* | MNHParis | 1904.582 |
| *Vipera_berus* | MNHParis | 1904.586 |
| *Vipera_berus* | MNHParis | 1898.407 |
| *Vipera_berus* | MNHParis | 1900.178 |
| *Vipera_berus* | MNHParis | 3999A |
| *Vipera_berus* | MNHParis | 1904.578 |
| *Vipera_berus* | MNHParis | 1884.579 |
| *Vipera_berus* | CAS | 14579 |
| *Vipera_berus* | CAS | 26101 |
| *Vipera_dinniki* | FMNH | 236002 |
| *Vipera_eriwanensis* | MNHParis | 1989.54 |
| *Vipera_eriwanensis* | MNHParis | 1989.52 |
| *Vipera_eriwanensis* | MNHParis | 1989.58 |
| *Vipera_eriwanensis* | MNHParis | 1989.57 |
| *Vipera_kaznakovi* | MNHParis | 1997.3302 |
| *Vipera_kaznakovi* | FMNH | 223694 |
| *Vipera_kaznakovi* | FMNH | 223695 |
| *Vipera_kaznakovi* | AMNH | 161837 |
| *Vipera_latastei* | BMNH | 1904.2.12.1-4 |
| *Vipera_latastei* | BMNH | 92.11.21.1 |
| *Vipera_latastei* | BMNH | 94.6.8.2 / 94.11.10.1 |
| *Vipera_latastei* | MNHParis | 5758 |
| *Vipera_latastei* | FMNH | 168015 |
| *Vipera_nikolskii* | FMNH | 257149 |
| *Vipera_renardi* | BMNH | 91.2.23.1 |
| *Vipera_renardi* | BMNH | 79.11.14.270 |
| *Vipera_renardi* | BMNH | 95.3.1.4-5 |
| *Vipera_renardi* | BMNH | 95.3.1.4-5 |
| *Vipera_renardi* | BMNH | 93.12.30.7 |
| *Vipera_renardi* | MNHParis | 1919.124 |
| *Vipera_renardi* | FMNH | 83965 |
| *Vipera_renardi* | AMNH | 84028 |
| *Vipera_renardi* | AMNH | 160760 |
| *Vipera_seoanei* | BMNH | 1914.5.26.35 |
| *Vipera_seoanei* | BMNH | 1920.1.20.2827 |
| *Vipera_seoanei* | BMNH | 95.4.30.35-37 |
| *Vipera_seoanei* | MNHParis | 1884.266 |
| *Vipera_seoanei* | MNHParis | 1889.584 |
| *Vipera_seoanei* | MNHParis | 1889.585 |
| *Vipera_seoanei* | MNHParis | 1971.278 |
| *Vipera_transcaucasiana* | UTA | R18219 |
| *Vipera_ursinii* | BMNH | 92.4.4.4 / 92.9.13.12-13 / 93.2.10.1-3 |
| *Vipera_ursinii* | MNHParis | 1898.334 |
| *Vipera_ursinii* | MNHParis | 1966.1069 |
| *Vipera_ursinii* | AMNH | 161847 |
| *Vipera_ursinii* | AMNH | 90453 |
